# Supplementary material for: Cost-effective dopant-free star-shaped oligo-aryl amines for high performance perovskite solar cells
Source: Royal Society of Chemistry journal article supplement (doi:10.1039/c9ta01278h), 2019-01-01
Supplement: c9ta01278h1.pdf [file c9ta01278h1.pdf]

# Supporting Information

## Cost-Effective Dopant-Free Star-Shaped Oligo- Arylamines for High Performance Perovskite Solar Cells

Jun-Ying Feng,<sup>a,d,†</sup> Kuan-Wen Lai,<sup>b,c,†</sup> Yuan-Shin Shiue,<sup>a</sup> Ashutosh Singh,<sup>a</sup> CH. Pavan Kumar,<sup>a</sup> Chun-Ting Li,<sup>a</sup> Wen-Ti Wu,<sup>a</sup> Jiann T. Lin,<sup>a,\*</sup> Chih-Wei Chu,<sup>b,\*</sup> Chien-Cheng Chang,<sup>c,\*</sup> and Chao-chin Su<sup>d</sup>

<sup>a</sup>Institute of Chemistry, Academia Sinica, 115 Nankang, Taipei, Taiwan, <sup>b</sup>Research Center for Applied Sciences, Academia Sinica, 115 Nankang, Taipei, Taiwan, <sup>c</sup>Institute of Applied Mechanics, National Taiwan University, Taipei, Taiwan, <sup>d</sup>Department of Molecular Science and Engineering, National Taipei University of Technology, Da'an 10608, Taipei, Taiwan

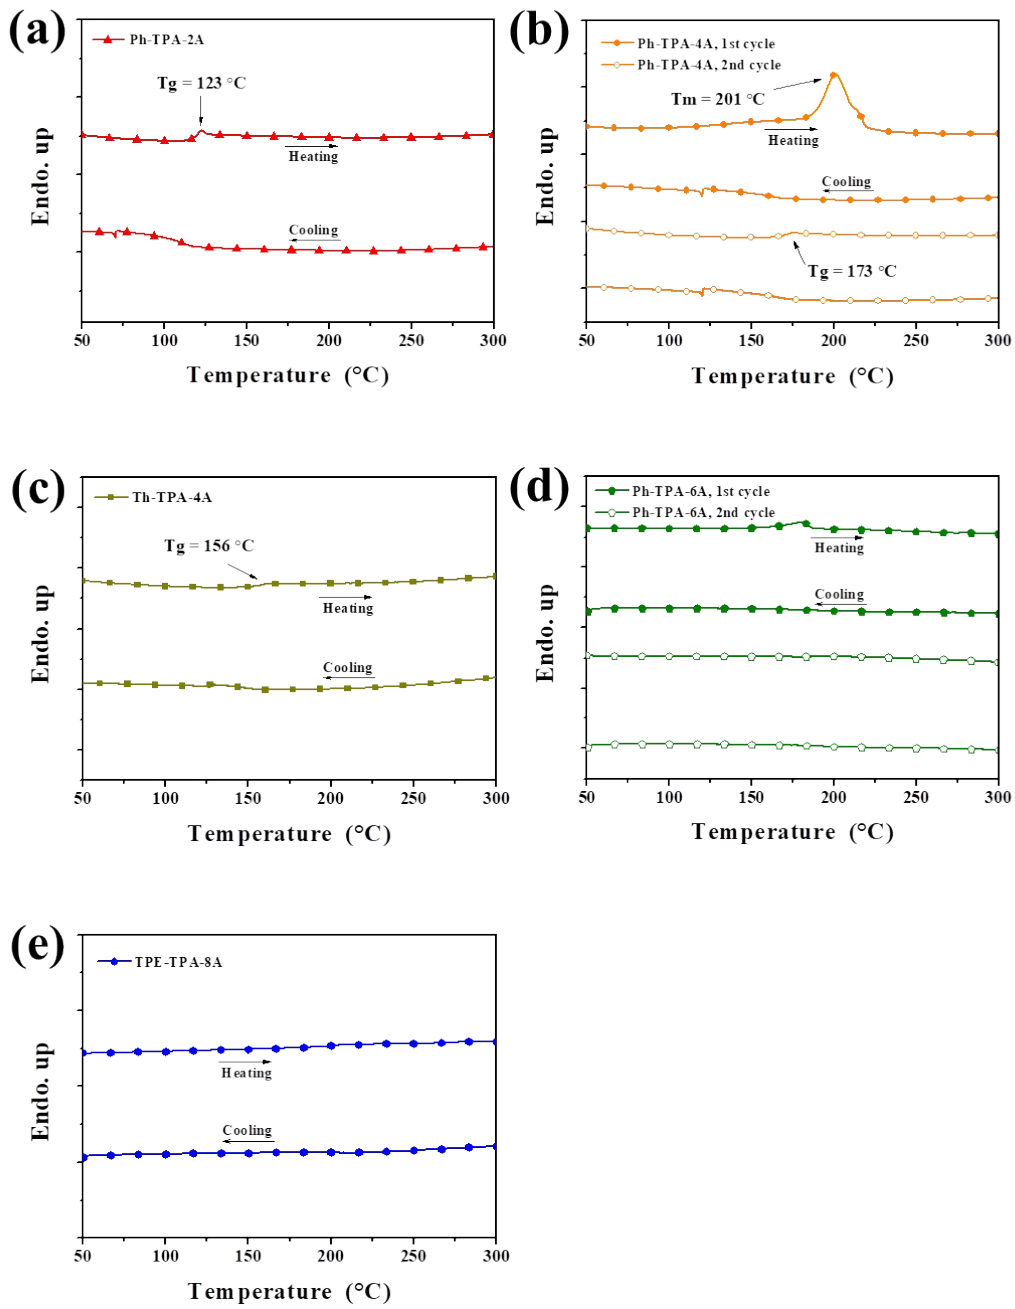

**Figure S1.** Differential Scanning calorimetry (DSC) thermograms of of HTMs.

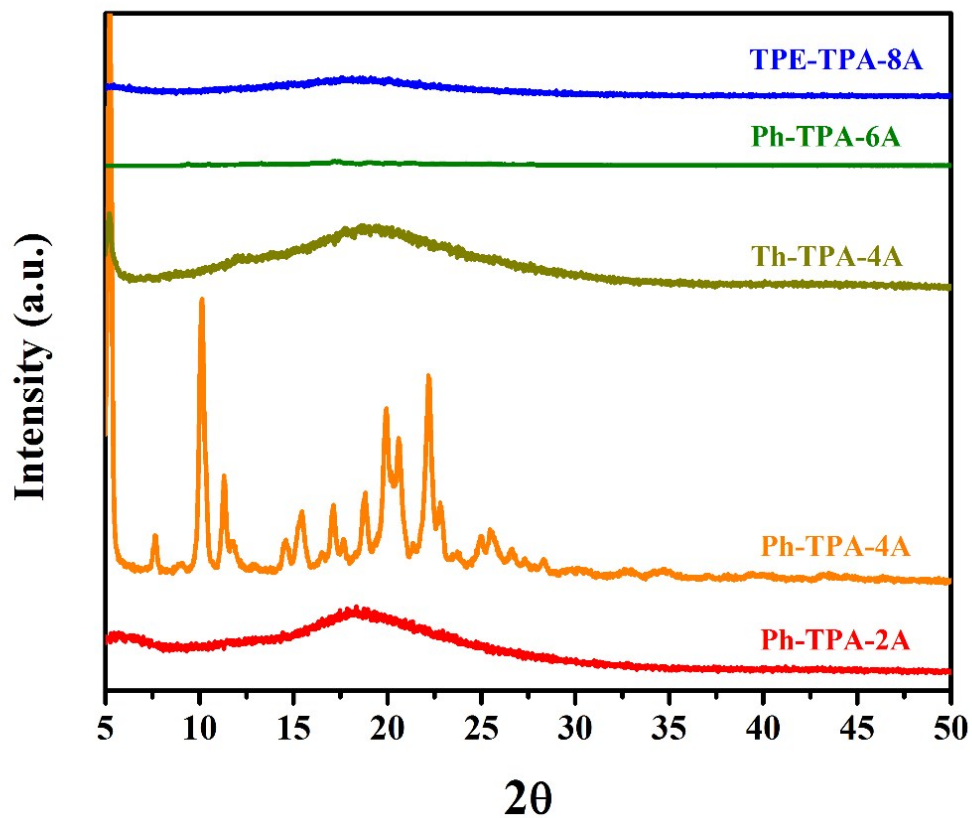

Figure S2. Powder X-ray diffraction patterns of the HTMs.

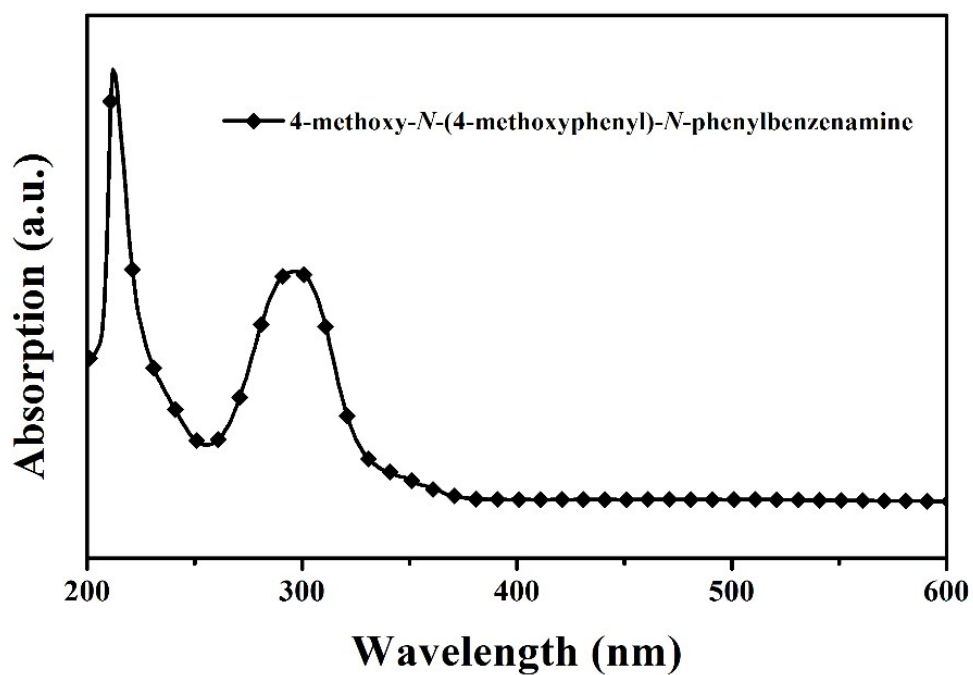

Figure S3. UV-Vis absorption spectrum of 4-methoxy-*N*-(4-methoxyphenyl)-*N*-phenylbenzenamine.

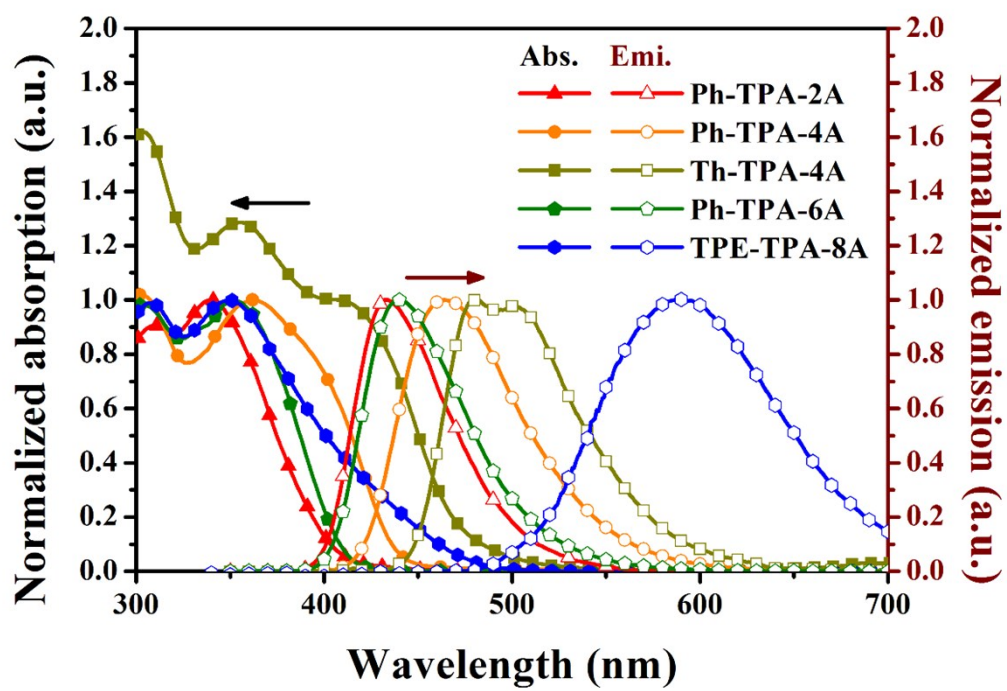

Figure S4. Normalized UV-Vis absorption and emission spectra of HTMs.

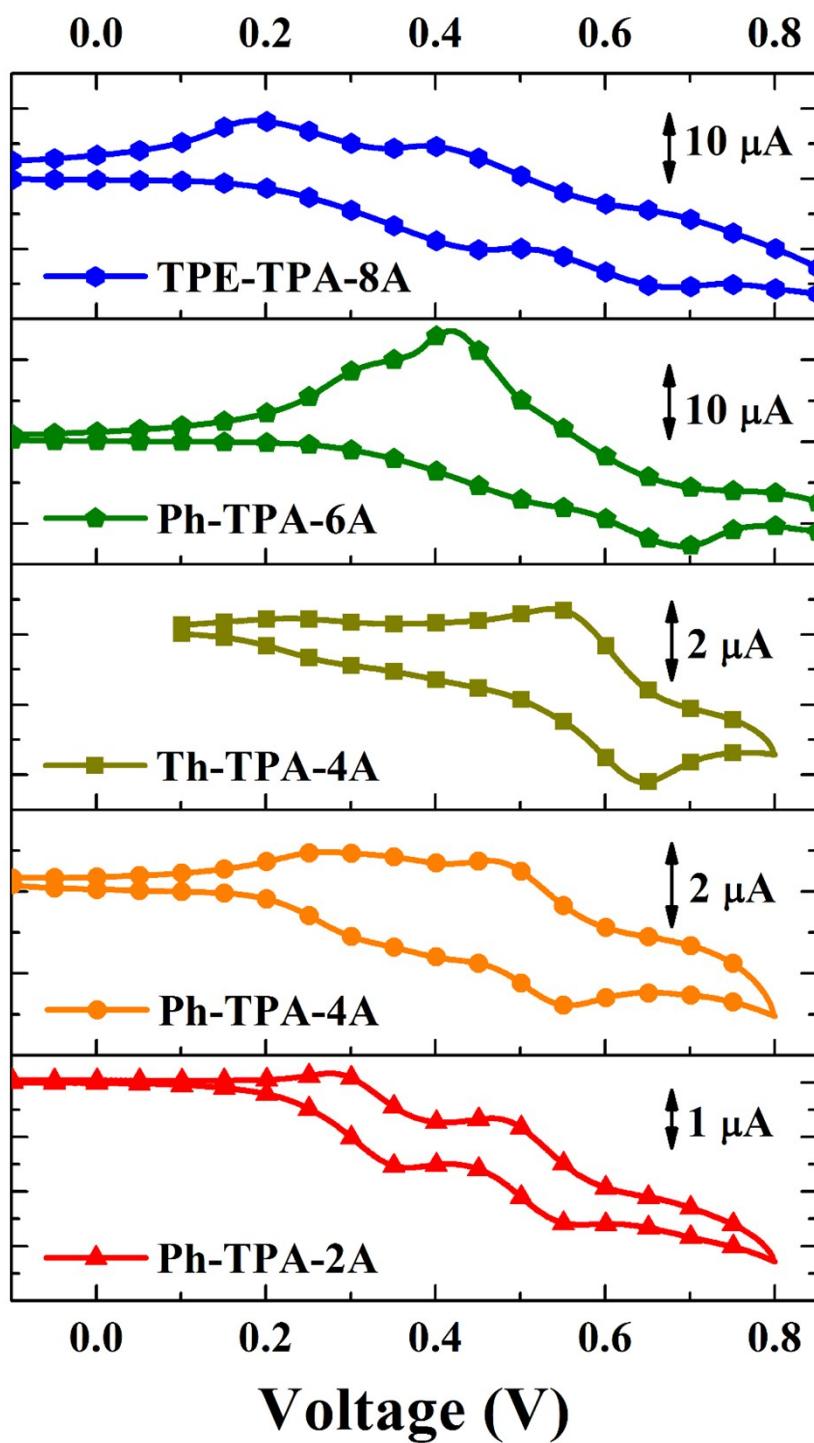

Figure S5. Cyclic voltammograms of HTMs.

**(a)**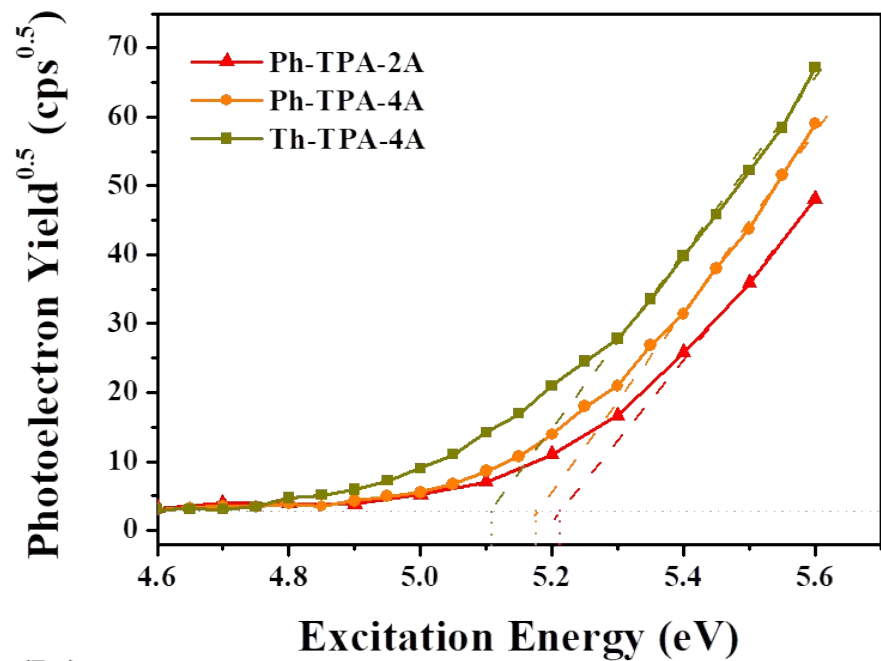**(b)**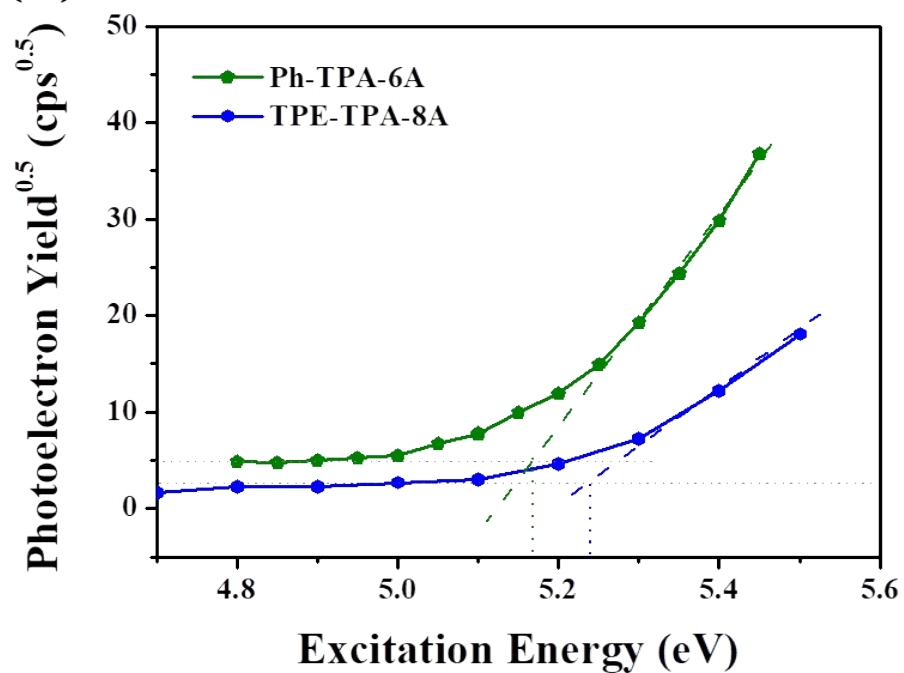

Figure S6. Photoelectron spectra of the HTM films.

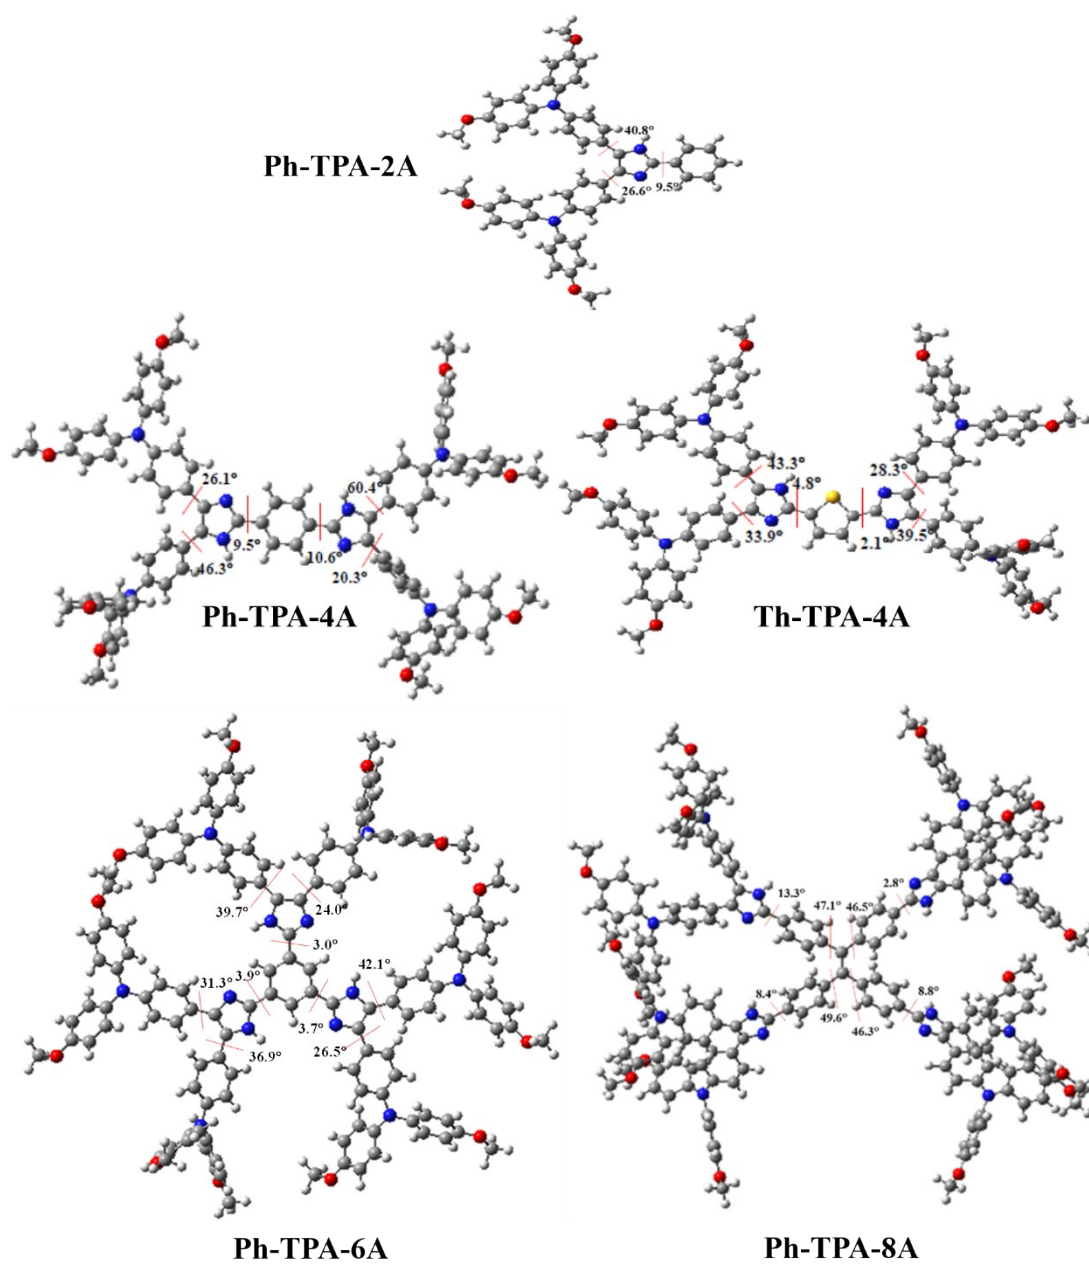

**Figure S7.** Optimized structures of HTMs.

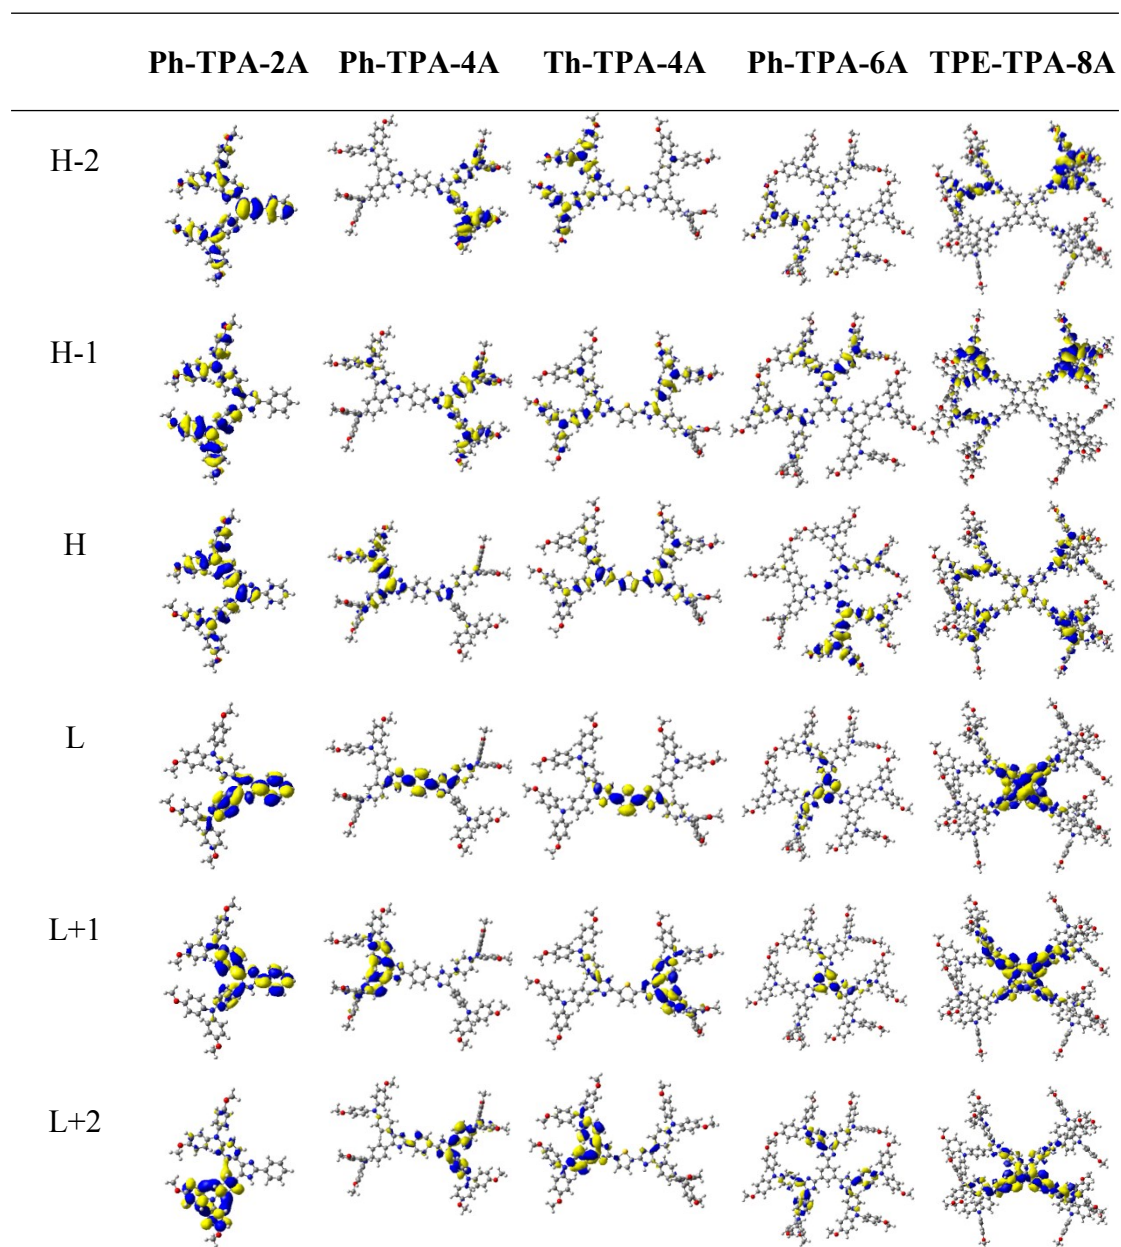

**Figure. S8.** Frontier orbitals of HTMs.



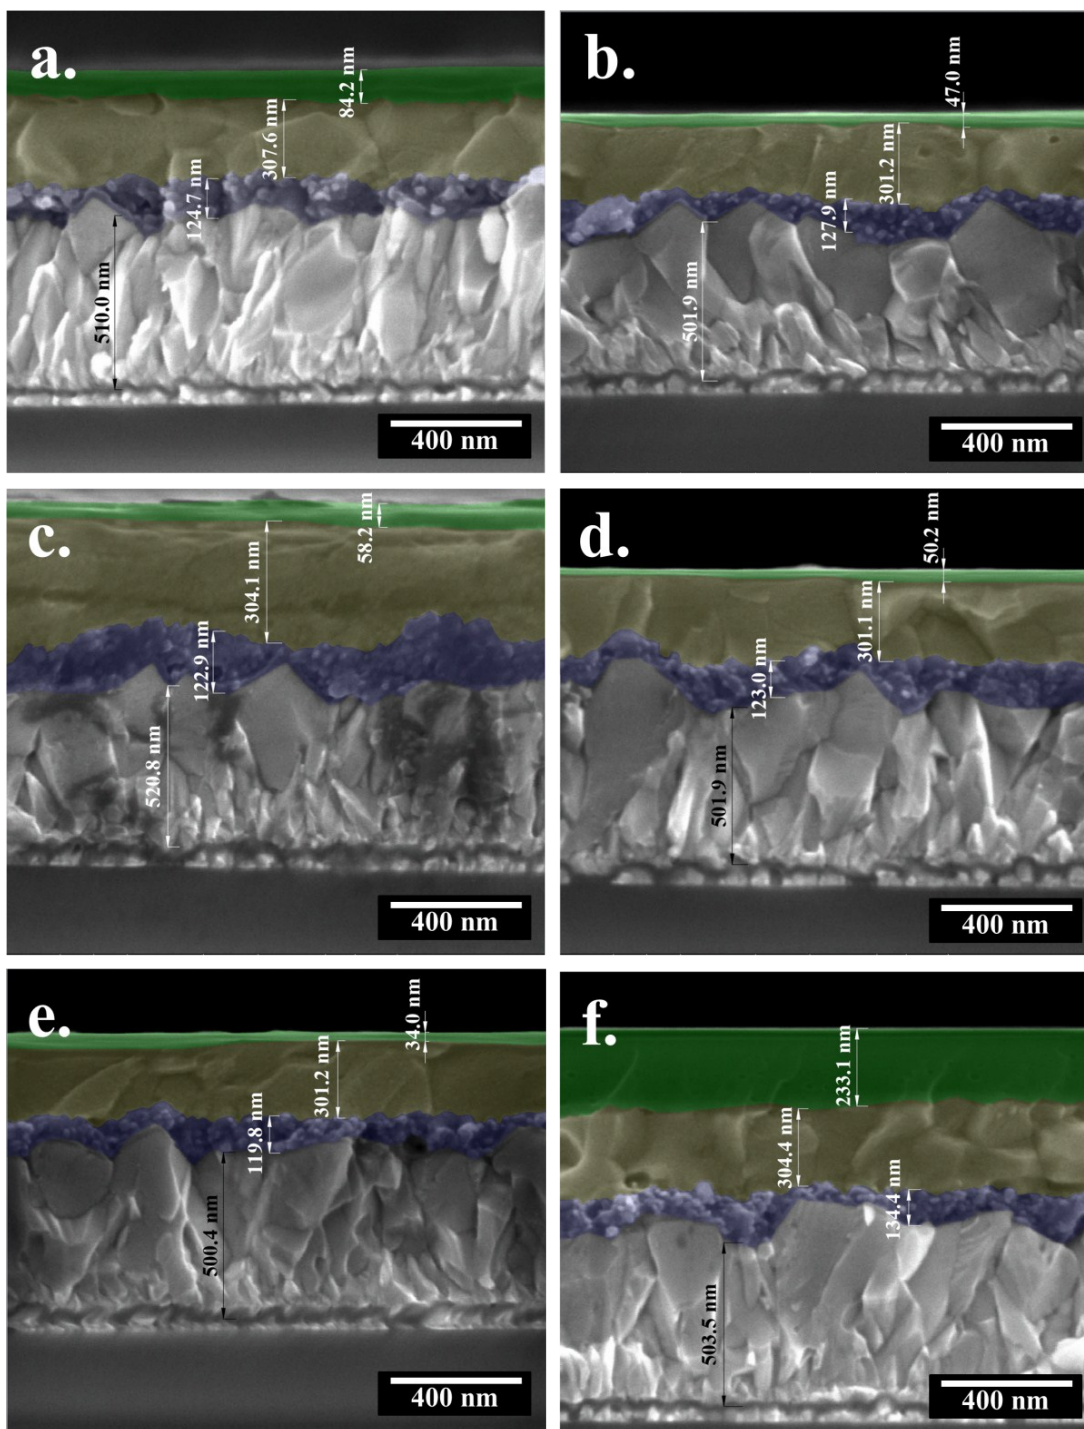

**Figure S9.** Cross-sectional SEM images using the device structure of FTO/TiO<sub>2</sub>/perovskite/HTM, where the HTM is (a) Ph-TPA-2A, (b) Ph-TPA-4A, (c) Th-TPA-4A, (d) Ph-TPA-6A, (e) TPE-TPA-8A, and (f) Spiro-OMeTAD.

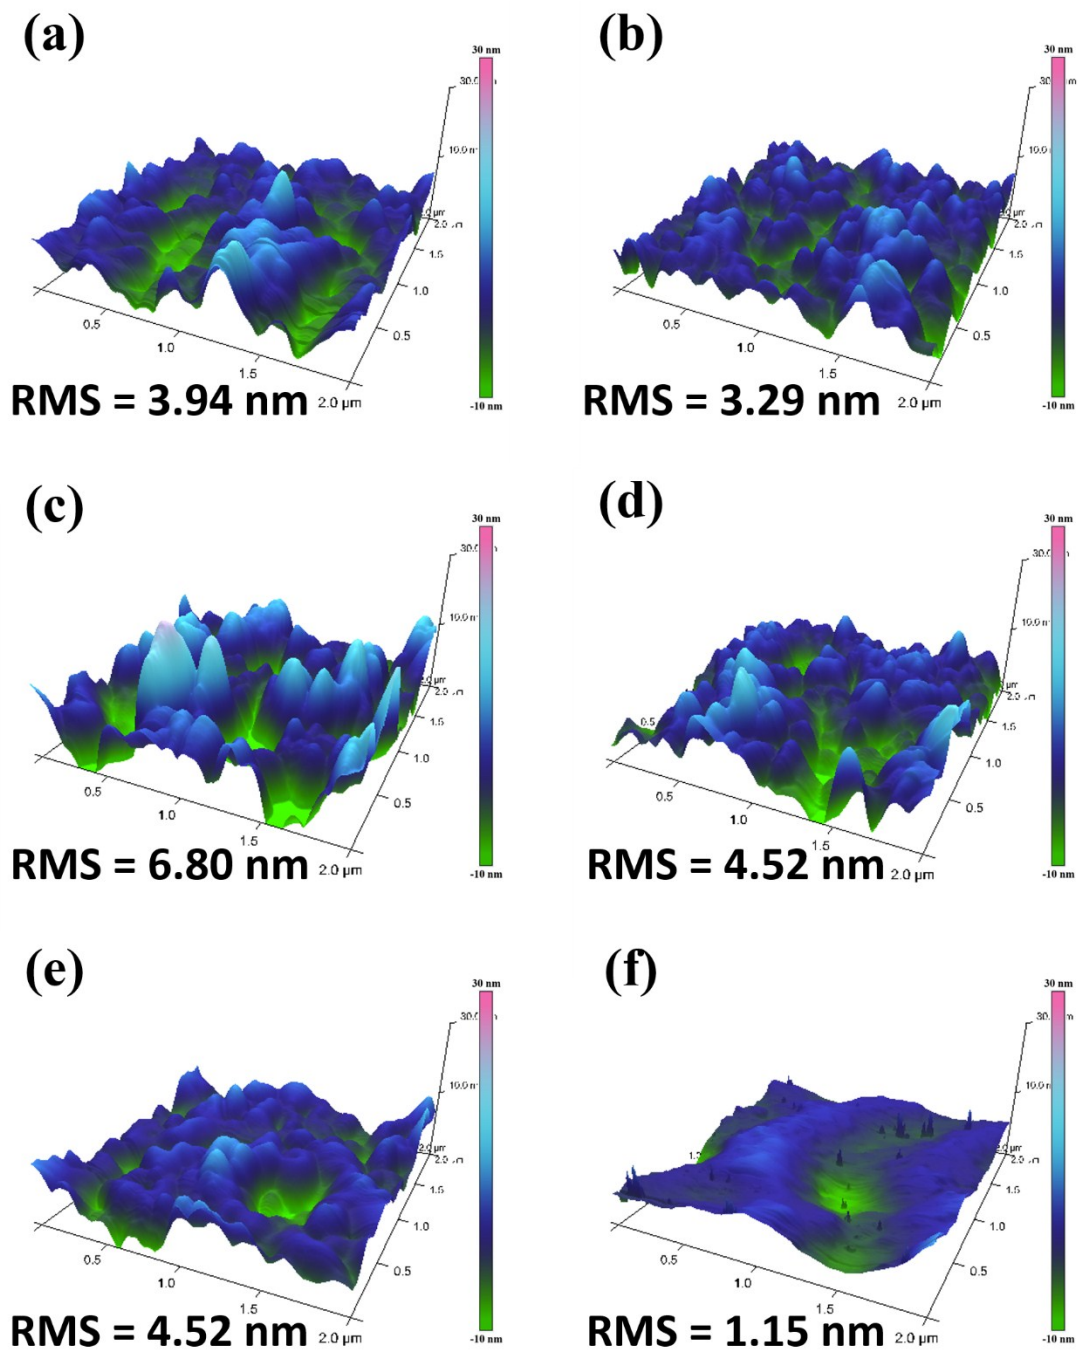

**Figure S10** The AFM images using the device structure of FTO/TiO<sub>2</sub>/perovskite/HTM, where the HTM is (a) Ph-TPA-2A, (b) Ph-TPA-4A, (c) Th-TPA-4A, (d) Ph-TPA-6A, (e) TPE-TPA-8A, and (f) Spiro-OMeTAD.

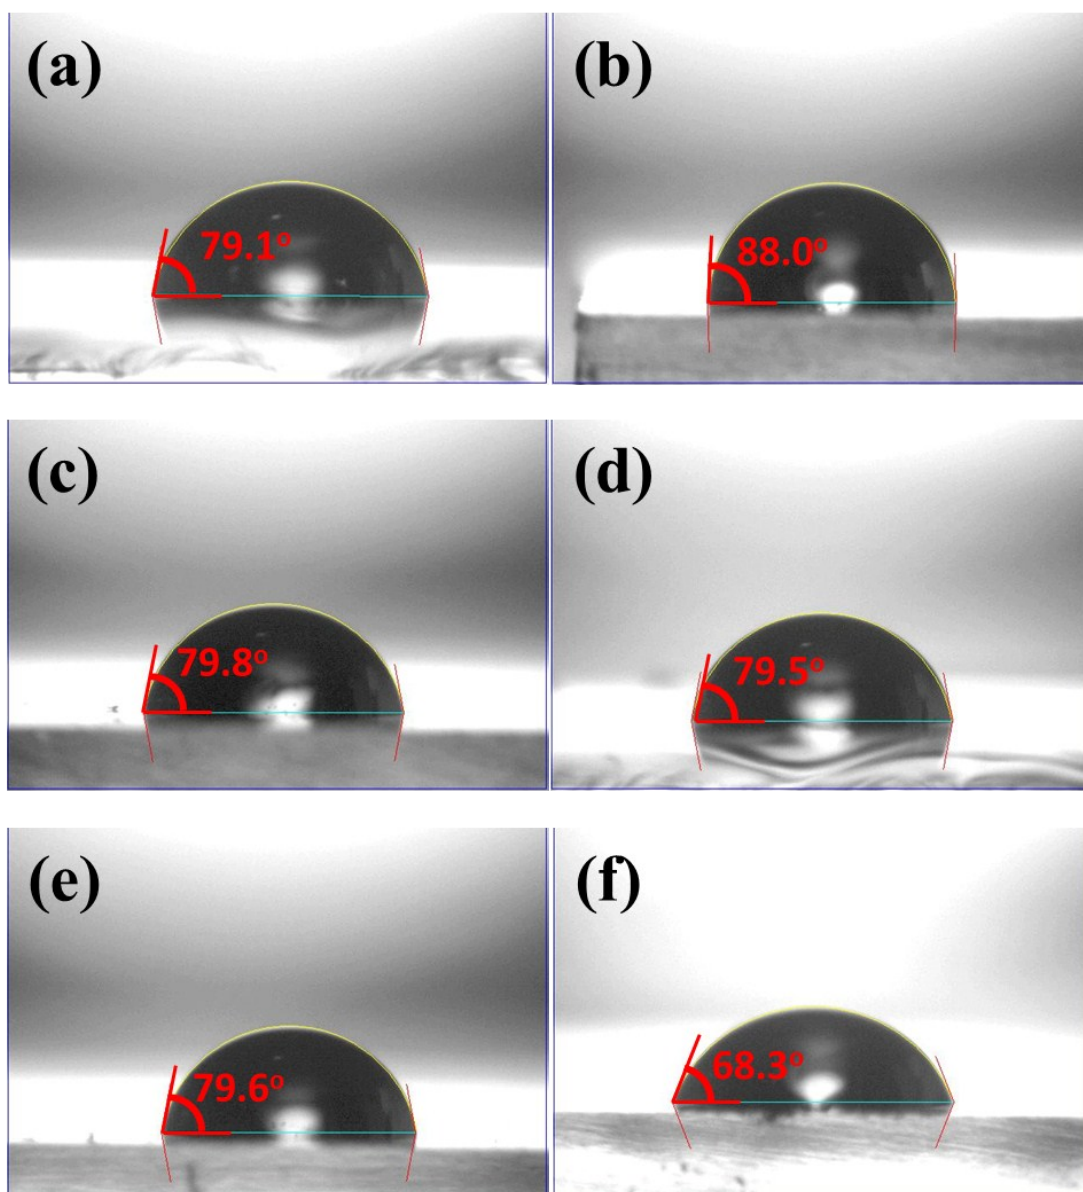

**Figure S11.** Contact angles of different HTMs on glass. (a) Ph-TPA-2A, (b) Ph-TPA-4A, (c) Th-TPA-4A, (d) Ph-TPA-6A, (e) TPE-TPA-8A, and (f) spiro-OMeTAD.

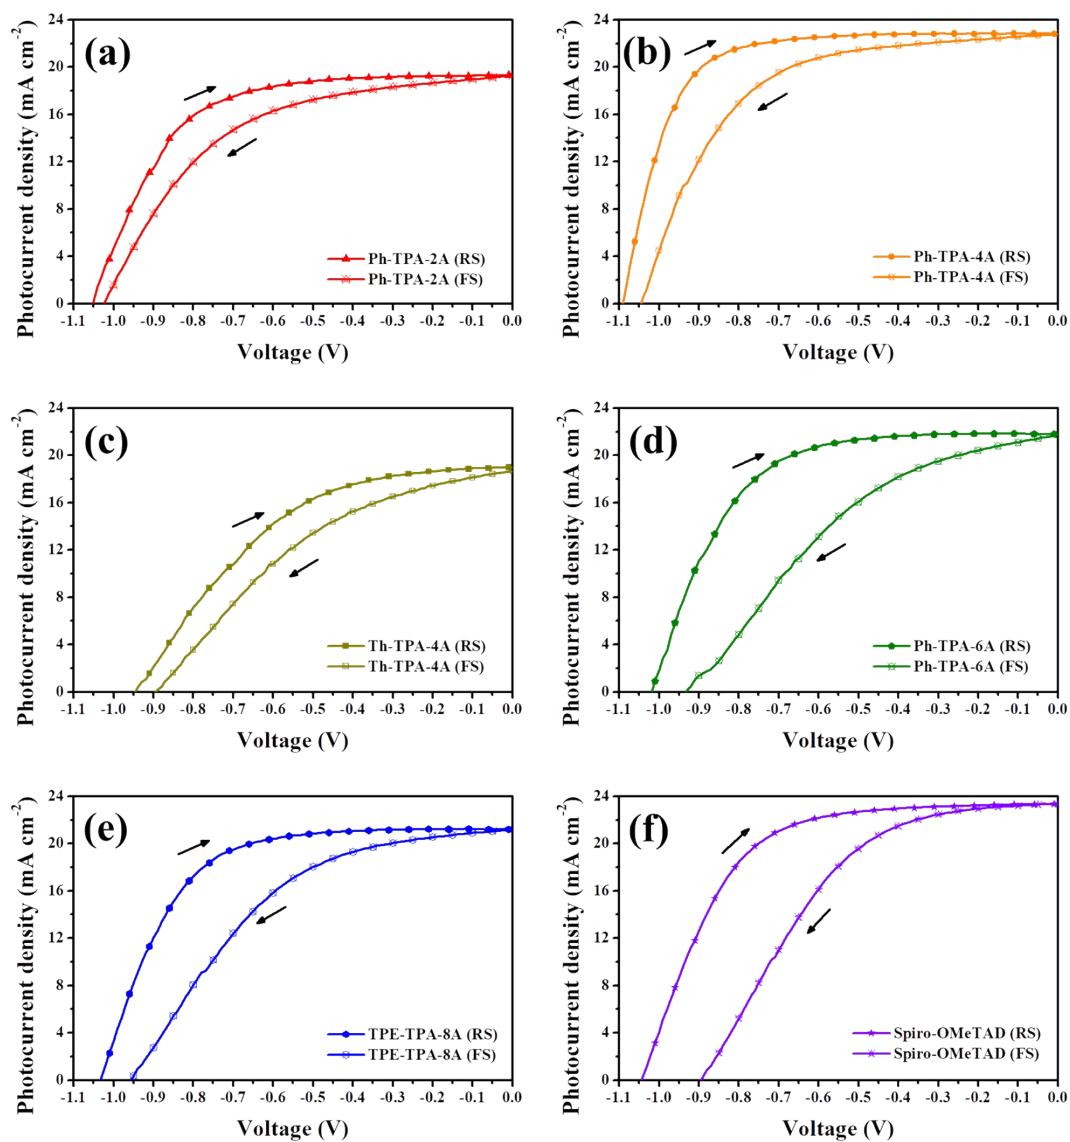

Figure S12.  $J$ - $V$  plots of HTMs for both forward and reverse scan.

**(a) Ph-TPA-2A**

|         |         |          |                                  | USD       |      |       |             |        |            |
|---------|---------|----------|----------------------------------|-----------|------|-------|-------------|--------|------------|
| Step1   | Reagent | 1        | CuI                              | 0.15 g    | 0.05 | 71% → | OMeTPA      |        |            |
|         |         | 2        | KO( <i>t</i> -Bu)                | 3.43 g    | 0.60 |       |             | 1.10 g |            |
|         |         | 3        | 1,10-Phenathraline               | 0.15 g    | 0.51 |       |             |        |            |
|         |         | 4        | aniline                          | 0.46 ml   | 0.08 |       |             |        |            |
|         |         | 5        | 4-Iodoanisole                    | 2.39 g    | 2.23 |       |             |        |            |
| Solvent | toluene | 25.28 ml | 0.16                             |           |      |       |             |        |            |
| Workup  | MeOH    | 50.56 ml | 0.72                             |           |      |       |             |        |            |
| Step2   | Reagent | 1        | NBS                              | 0.65 g    | 0.07 | 92% → | OMeTPABr    |        |            |
|         | Solvent |          | CHCl <sub>3</sub>                | 12.36 ml  | 0.43 |       |             | 1.28 g |            |
| Step3   | Reagent | 1        | 1,4-dimethylpiperazine-2,3-dione | 214.89 mg | 0.75 | 93% → | OMeTPAdione |        |            |
|         |         | 2        | <i>n</i> -BuLi                   | 1.98 ml   | 0.16 |       |             | 0.93 g |            |
|         |         | Solvent  | THF                              | 5.76 ml   | 0.24 |       |             |        |            |
|         |         | Workup   | DCM                              | 165.03 ml | 2.46 |       |             |        |            |
| Step4   | Reagent | 1        | benzaldehyde                     | 0.21 ml   | 0.01 | 95% → | Ph-TPA-2A   |        |            |
|         |         | 2        | ammonium acetate                 | 2.46 g    | 0.21 |       |             | 1.00 g |            |
|         |         | Solvent  | HOAc                             | 25.28 ml  | 0.54 |       |             |        | 9.31 USD/g |
|         |         | Workup   | HOAc                             | 4.21 ml   | 0.09 |       |             |        |            |

**(b) Ph-TPA-4A**

|         |         |          |                                  | USD       |      |       |             |        |             |
|---------|---------|----------|----------------------------------|-----------|------|-------|-------------|--------|-------------|
| Step1   | Reagent | 1        | CuI                              | 0.18 g    | 0.06 | 71% → | OMeTPA      |        |             |
|         |         | 2        | KO( <i>t</i> -Bu)                | 3.98 g    | 0.70 |       |             | 1.28 g |             |
|         |         | 3        | 1,10-Phenathraline               | 0.17 g    | 0.59 |       |             |        |             |
|         |         | 4        | aniline                          | 0.54 ml   | 0.09 |       |             |        |             |
|         |         | 5        | 4-Iodoanisole                    | 2.76 g    | 2.58 |       |             |        |             |
| Solvent | toluene | 29.27 ml | 0.18                             |           |      |       |             |        |             |
| Workup  | MeOH    | 58.54 ml | 0.83                             |           |      |       |             |        |             |
| Step2   | Reagent | 1        | NBS                              | 0.75 g    | 0.08 | 92% → | OMeTPABr    |        |             |
|         | Solvent |          | CHCl <sub>3</sub>                | 14.31 ml  | 0.50 |       |             | 1.48 g |             |
| Step3   | Reagent | 1        | 1,4-dimethylpiperazine-2,3-dione | 248.78 mg | 0.87 | 93% → | OMeTPAdione |        |             |
|         |         | 2        | <i>n</i> -BuLi                   | 2.29 ml   | 0.19 |       |             | 1.08 g |             |
|         |         | Solvent  | THF                              | 6.67 ml   | 0.28 |       |             |        |             |
|         |         | Workup   | DCM                              | 191.06 ml | 2.84 |       |             |        |             |
| Step4   | Reagent | 1        | terephthalaldehyde               | 108.94 mg | 0.05 | 86% → | Ph-TPA-4A   |        |             |
|         |         | 2        | ammonium acetate                 | 0.94 g    | 0.08 |       |             | 1.00 g |             |
|         |         | Solvent  | HOAc                             | 32.52 ml  | 0.69 |       |             |        | 10.96 USD/g |
|         |         | Workup   | HOAc                             | 16.26 ml  | 0.35 |       |             |        |             |

**Figure S13.** Flow chart for estimation of the synthetic cost for HTMs: (a) Ph-TPA-2A, (b) Ph-TPA-4A, (c) Th-TPA-4A, (d) Ph-TPA-6A, (e) TPE-TPA-8A.

### (c) Th-TPA-4A

|        |         |                                    |           | USD  |     |   |             |        |             |
|--------|---------|------------------------------------|-----------|------|-----|---|-------------|--------|-------------|
| Step1  | Reagent | 1 CuI                              | 0.18 g    | 0.06 | 71% | → | OMeTPA      |        |             |
|        |         | 2 KO( <i>t</i> -Bu)                | 4.08 g    | 0.72 |     |   |             | 1.31 g |             |
|        |         | 3 1,10-Phenathraline               | 0.17 g    | 0.61 |     |   |             |        |             |
|        |         | 4 aniline                          | 0.55 ml   | 0.09 |     |   |             |        |             |
|        |         | 5 4-Iodoanisole                    | 2.83 g    | 2.65 |     |   |             |        |             |
|        | Solvent | toluene                            | 30.00 ml  | 0.19 |     |   |             |        |             |
| Workup | MeOH    | 60.00 ml                           | 0.85      |      |     |   |             |        |             |
| Step2  | Reagent | 1 NBS                              | 0.77 g    | 0.08 | 92% | → | OMeTPABr    |        |             |
|        | Solvent | CHCl <sub>3</sub>                  | 14.67 ml  | 0.51 |     |   |             | 1.52 g |             |
| Step3  | Reagent | 1 1,4-dimethylpiperazine-2,3-dione | 255.00 mg | 0.89 | 93% | → | OMeTPAdione |        |             |
|        |         | 2 <i>n</i> -BuLi                   | 2.35 ml   | 0.19 |     |   |             | 1.11 g |             |
|        | Solvent | THF                                | 6.83 ml   | 0.29 |     |   |             |        |             |
|        | Workup  | DCM                                | 195.83 ml | 2.92 |     |   |             |        |             |
| Step4  | Reagent | 1 2,5-Thiophenedicarboxaldehyde    | 116.67 mg | 4.40 | 85% | → | Th-TPA-4A   |        |             |
|        |         | 2 ammonium acetate                 | 0.97 g    | 0.08 |     |   |             | 1.00 g |             |
|        | Solvent | HOAc                               | 33.33 ml  | 0.71 |     |   |             |        | 15.59 USD/g |
|        | Workup  | HOAc                               | 16.67 ml  | 0.36 |     |   |             |        |             |

### (d) Ph-TPA-6A

|        |         |                                    |           | USD   |     |   |             |        |             |
|--------|---------|------------------------------------|-----------|-------|-----|---|-------------|--------|-------------|
| Step1  | Reagent | 1 CuI                              | 0.19 g    | 0.07  | 71% | → | OMeTPA      |        |             |
|        |         | 2 KO( <i>t</i> -Bu)                | 4.22 g    | 0.74  |     |   |             | 1.35 g |             |
|        |         | 3 1,10-Phenathraline               | 0.18 g    | 0.63  |     |   |             |        |             |
|        |         | 4 aniline                          | 0.57 ml   | 0.10  |     |   |             |        |             |
|        |         | 5 4-Iodoanisole                    | 2.93 g    | 2.74  |     |   |             |        |             |
|        | Solvent | toluene                            | 31.03 ml  | 0.19  |     |   |             |        |             |
| Workup | MeOH    | 62.07 ml                           | 0.88      |       |     |   |             |        |             |
| Step2  | Reagent | 1 NBS                              | 0.79 g    | 0.08  | 92% | → | OMeTPABr    |        |             |
|        | Solvent | CHCl <sub>3</sub>                  | 15.17 ml  | 0.53  |     |   |             | 1.57 g |             |
| Step3  | Reagent | 1 1,4-dimethylpiperazine-2,3-dione | 263.79 mg | 0.92  | 93% | → | OMeTPAdione |        |             |
|        |         | 2 <i>n</i> -BuLi                   | 2.43 ml   | 0.20  |     |   |             | 1.15 g |             |
|        | Solvent | THF                                | 7.07 ml   | 0.30  |     |   |             |        |             |
|        | Workup  | DCM                                | 202.59 ml | 3.02  |     |   |             |        |             |
| Step4  | Reagent | 1 benzene-1,3,5-tricarbaldehyde    | 93.10 mg  | 29.01 | 83% | → | Ph-TPA-6A   |        |             |
|        |         | 2 ammonium acetate                 | 0.89 g    | 0.08  |     |   |             | 1.00 g |             |
|        | Solvent | HOAc                               | 34.48 ml  | 0.74  |     |   |             |        | 40.57 USD/g |
|        | Workup  | HOAc                               | 17.24 ml  | 0.37  |     |   |             |        |             |

Figure S13. (conti.)

### (e) TPE-TPA-8A

|         |         |                                                            |           | USD    |     |             |   |        |              |
|---------|---------|------------------------------------------------------------|-----------|--------|-----|-------------|---|--------|--------------|
| Step1   | Reagent | 1 CuI                                                      | 0.53 g    | 0.18   | 71% | OMeTPA      |   |        |              |
|         |         | 2 KO( <i>t</i> -Bu)                                        | 11.75 g   | 2.07   |     |             | → |        |              |
|         |         | 3 1,10-Phenathraline                                       | 0.50 g    | 1.75   |     |             |   |        |              |
|         |         | 4 aniline                                                  | 1.59 ml   | 0.27   |     |             |   |        |              |
|         |         | 5 4-Iodoanisole                                            | 8.17 g    | 7.64   |     |             |   |        |              |
| Solvent | toluene | 86.54 ml                                                   | 0.54      |        |     |             |   |        |              |
| Workup  | MeOH    | 173.08 ml                                                  | 2.46      |        |     |             |   |        |              |
| Step2   | Reagent | 1 NBS                                                      | 2.22 g    | 0.23   | 92% | OMeTPABr    |   |        |              |
|         | Solvent | CHCl <sub>3</sub>                                          | 42.31 ml  | 1.48   |     |             | → | 4.38 g |              |
| Step3   | Reagent | 1 1,4-dimethylpiperazine-2,3-dione                         | 735.58 mg | 2.56   | 93% | OMeTPAdione |   |        |              |
|         |         | 2 <i>n</i> -BuLi                                           | 6.78 ml   | 0.56   |     |             | → | 3.20 g |              |
|         | Solvent | THF                                                        | 19.71 ml  | 0.83   |     |             |   |        |              |
|         | Workup  | DCM                                                        | 564.90 ml | 8.41   |     |             |   |        |              |
| Step4   | Reagent | 1 4,4',4''',4'''-(ethene-1,1,2,2-tetrayl)tetrabenzaldehyde | 521.63 mg | 233.85 | 28% | TPE-TPA-8A  |   |        |              |
|         |         | 2 ammonium acetate                                         | 3.62 g    | 0.31   |     |             | → | 1.00 g |              |
|         | Solvent | HOAc                                                       | 86.54 ml  | 1.85   |     |             |   |        | 265.99 USD/g |
|         | Workup  | HOAc                                                       | 48.08 ml  | 1.03   |     |             |   |        |              |

Figure S13. (conti.)

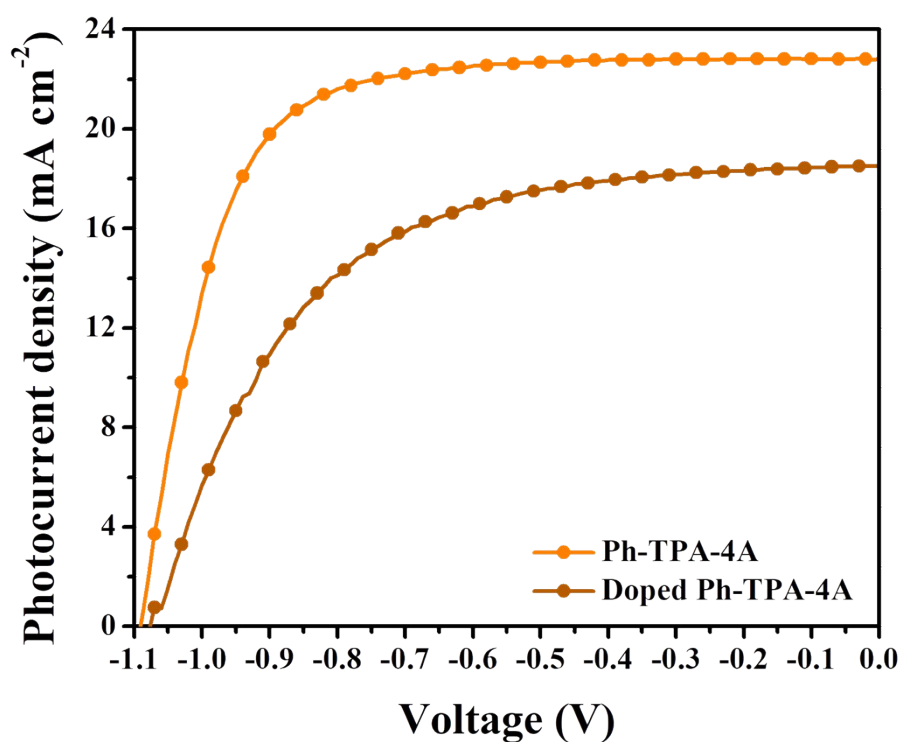

Figure S14. The  $J$ - $V$  plot of doped Ph-TPA-4A compares with non-doped Ph-TPA-4A.

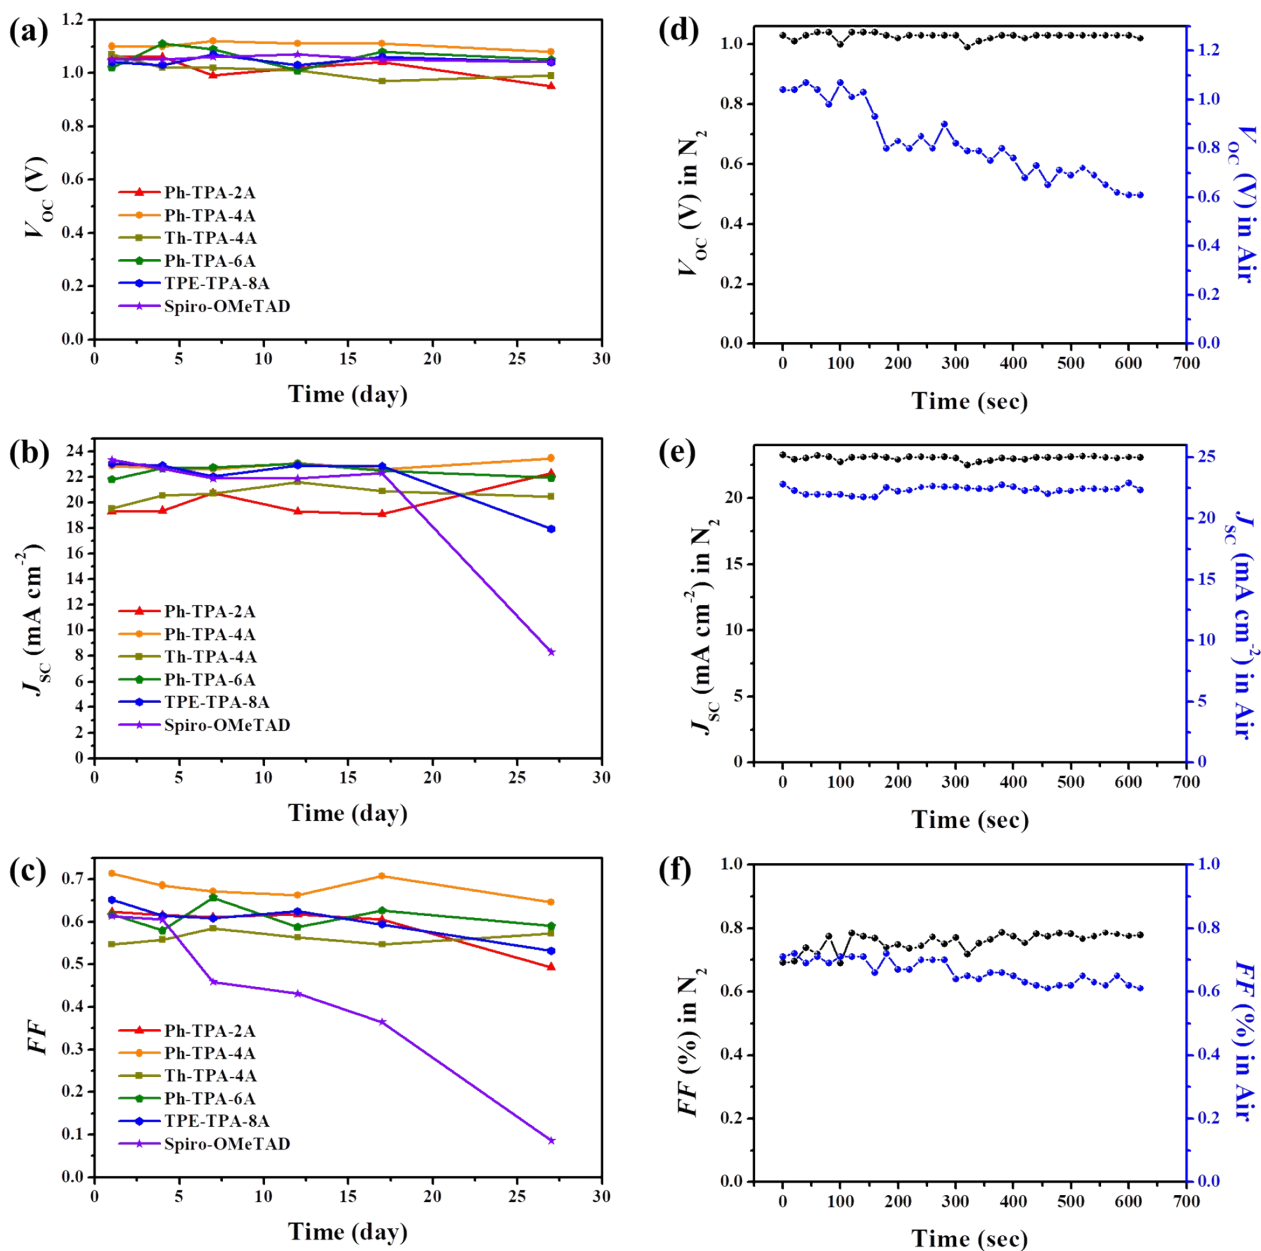

**Figure S15.** At-rest stability tests of PSCs with various HTMs based on the values of (a)  $V_{oc}$ , (b)  $J_{sc}$ , and (c)  $FF$ , measured in a  $\text{N}_2$  glove box. Continuous stability test of the **Ph-TPA-4A** PSC under a continuous light soaking (1 sun) for 600 s, based on the values of (a)  $V_{oc}$ , (b)  $J_{sc}$ , and (c)  $FF$ , in a  $\text{N}_2$  glove box (Black lines) or in air (Blue lines).



**Table S1a.** Calculated excitation energies for **Ph-TPA-2A** in THF solution.

| N_States | <i>E</i> (ev) | WL (nm) | <i>f</i> | Major Contributions        |
|----------|---------------|---------|----------|----------------------------|
| 1        | 3.01          | 410.62  | 0.5652   | H→L (89%)                  |
| 2        | 3.26          | 379.38  | 0.5533   | H→L+1 (88%)                |
| 3        | 3.34          | 371.08  | 0.0786   | H→L+2 (70%), H→L+3 (10%)   |
| 4        | 3.38          | 366.43  | 0.2644   | H-1→L (80%), H→L+2 (10%)   |
| 5        | 3.43          | 361.39  | 0.011    | H-1→L+2 (18%), H→L+3 (70%) |
| 6        | 3.70          | 334.83  | 0.0402   | H-1→L+1 (95%)              |
| 7        | 3.71          | 333.67  | 0.016    | H-1→L+2 (67%), H→L+2 (13%) |
| 8        | 3.88          | 319.32  | 0.0159   | H-1→L+3 (46%), H→L+6 (26%) |
| 9        | 3.91          | 316.65  | 0.2363   | H-1→L+5 (19%), H→L+5 (68%) |
| 10       | 3.94          | 314.81  | 0.1666   | H→L+8 (18%), H→L+9 (34%)   |

WL: wavelength; *f*: oscillator strength; H: HOMO; H-n: HOMO-n; L: LUMO; L+n: LUMO+n.

**Table S1b.** Calculated excitation energies for **Ph-TPA-4A** in THF solution.

| N_States | <i>E</i> (ev) | WL (nm) | <i>f</i> | Major Contributions          |
|----------|---------------|---------|----------|------------------------------|
| 1        | 2.66          | 465     | 1.4123   | H→L (93%)                    |
| 2        | 2.88          | 430     | 0.1073   | H-1→L (95%)                  |
| 3        | 3.03          | 408     | 0.1706   | H-2→L (97%)                  |
| 4        | 3.08          | 401     | 0.1961   | H-3→L (76%), H→L+1 (19%)     |
| 5        | 3.15          | 393     | 0.485    | H-3→L (21%), H→L+1 (67%)     |
| 6        | 3.36          | 368     | 0.0299   | H→L+3 (67%), H→L+6 (12%)     |
| 7        | 3.37          | 366     | 0.4771   | H-1→L+2 (37%), H→L+2 (37%)   |
| 8        | 3.42          | 362     | 0.2026   | H-2→L+4 (12%), H-1→L+4 (40)  |
| 9        | 3.43          | 361     | 0.0316   | H-3→L+3 (17%), H→L+6 (58%)   |
| 10       | 3.48          | 356     | 0.0507   | H-2→L+5 (30%), H-1→L+5 (49%) |

WL: wavelength; *f*: oscillator strength; H: HOMO; H-n: HOMO-n; L: LUMO; L+n: LUMO+n.

**Table S1c.** Calculated excitation energies for **Th-TPA-4A** in THF solution.

| N_States | <i>E</i> (ev) | WL (nm) | <i>f</i> | Major Contributions         |
|----------|---------------|---------|----------|-----------------------------|
| 1        | 2.49          | 498     | 1.2925   | H→L (97%)                   |
| 2        | 2.73          | 453     | 0.0169   | H-1→L(99%)                  |
| 3        | 2.95          | 420     | 0.1921   | H-2→L (94%)                 |
| 4        | 2.98          | 415     | 0.0608   | H-3→L (91%)                 |
| 5        | 3.11          | 398     | 0.2891   | H-1→L+1 (13%), H→L+1 (72%)  |
| 6        | 3.15          | 393     | 0.876    | H-1→L+2 (14%), H→L+2 (67%)  |
| 7        | 3.31          | 373     | 0.03     | H-1->L+3 (24%), H→L+3 (64%) |
| 8        | 3.34          | 371     | 0.2847   | H-4→L (31%), H→L+4 (40%)    |
| 9        | 3.35          | 370     | 0.5009   | H-4→L (56%), H→L+4 (22%)    |
| 10       | 3.42          | 362     | 0.0241   | H-1→L+5 (26%), H→L+5 (40%)  |

WL: wavelength; *f*: oscillator strength; H: HOMO; H-n: HOMO-n; L: LUMO; L+n: LUMO+n.

**Table S1d.** Calculated excitation energies for **Ph-TPA-6A** in THF solution.

| N_States | <i>E</i> (ev) | WL (nm) | <i>f</i> | Major Contributions                                                    |
|----------|---------------|---------|----------|------------------------------------------------------------------------|
| 1        | 2.88          | 430.49  | 0.6595   | H-2→L (36%), H-1→L+1 (20%),<br>H→L (34%)                               |
| 2        | 2.89          | 428.60  | 0.4959   | H-2→L+1 (15%), H-1→L (35%), H-<br>1→L+1 (13%), H→L+1 (16%)             |
| 3        | 2.90          | 427.14  | 0.1116   | H-1→L+1 (35%), H→L (28%),<br>H→L+1 (21%)                               |
| 4        | 2.96          | 417.59  | 0.0824   | H-2→L (36%), H-1→L (18%), H-1-<br>>L+1 (24%), H→L (15%)                |
| 5        | 2.98          | 415.99  | 0.0754   | H-2→L (15%), H-2→L+1 (23%), H-<br>1→L (34%), H→L (10%), H→L+1<br>(13%) |
| 6        | 2.98          | 415.22  | 0.0699   | H-2→L+1 (47%), H→L+1 (42%)                                             |
| 7        | 3.19          | 388.13  | 0.4852   | H-2→L+2 (12%), H→L+2 (20%),<br>H→L+3 (34%)                             |
| 8        | 3.20          | 387.24  | 0.5497   | H-3→L (10%), H-2→L+2 (15%), H-<br>1→L+4 (19%), H→L+2 (21%)             |
| 9        | 3.21          | 386.60  | 0.8732   | H-2→L+4 (20%), H-1→L+2 (34%)                                           |
| 10       | 3.26          | 380.53  | 0.3661   | H-4→L (20%), H-3→L (42%)                                               |

WL: wavelength; *f*: oscillator strength; H: HOMO; H-n: HOMO-n; L: LUMO; L+n: LUMO+n.

**Table S1e.** Calculated excitation energies for **TPE-TPA-8A** in THF solution.

| N_States | $E$ (ev) | WL (nm) | $f$    | Major Contributions |
|----------|----------|---------|--------|---------------------|
| 1        | 2.37     | 522.98  | 0.5342 | H→L (95%)           |
| 2        | 2.47     | 500.78  | 0.0326 | H-1→L (90%)         |
| 3        | 2.48     | 498.48  | 0.5542 | H-2→L (91%)         |
| 4        | 2.53     | 489.83  | 0.004  | H-3→L (96%)         |
| 5        | 2.79     | 444.14  | 0.0931 | H-4→L (90%)         |
| 6        | 2.81     | 440.82  | 0.1042 | H-5→L (93%)         |
| 7        | 2.82     | 439.50  | 0.1029 | H-6→L (92%)         |
| 8        | 2.83     | 437.50  | 0.0526 | H-7→ (91%)          |
| 9        | 2.97     | 416.91  | 1.0023 | H→ L+1 (78%)        |
| 10       | 2.99     | 413.63  | 0.4001 | H→ L+2 (70%)        |

WL: wavelength;  $f$ : oscillator strength; H: HOMO; H-n: HOMO-n; L: LUMO; L+n: LUMO+n.

**Table S1f.** Calculated HOMOs and LUMOs energies (eV) of the oligo arylamine HTMs in THF medium using B3LYP function.

|                | <b>Ph-TPA-2A</b> | <b>Ph-TPA-4A</b> | <b>Th-TPA-4A</b> | <b>Ph-TPA-6A</b> | <b>TPE-TPA-8A</b> |
|----------------|------------------|------------------|------------------|------------------|-------------------|
| <b>H-2</b>     | -5.78            | -5.04            | -5.07            | -4.79            | -4.78             |
| <b>H-1</b>     | -5.09            | -4.88            | -4.84            | -4.77            | -4.77             |
| <b>H</b>       | -4.77            | -4.72            | -4.67            | -4.76            | -4.71             |
| <b>L</b>       | -1.30            | -1.68            | -1.80            | -1.49            | -2.01             |
| <b>L+1</b>     | -1.00            | -1.08            | -1.11            | -1.48            | -1.39             |
| <b>L+2</b>     | -0.89            | -0.91            | -1.03            | -1.11            | -1.36             |
| <b>H-L gap</b> | 3.47             | 3.04             | 2.87             | 3.27             | 2.70              |

**Table S2.** The PCE (> 14%) and hole mobility values for HTMs published in 2016–2019.

| HTM name                                       | Perovskite                                                                   | PCE (%) | $\mu_h$ (cm <sup>2</sup> V <sup>-1</sup> s <sup>-1</sup> ) | ref. | Molecular structure                                                                 |
|------------------------------------------------|------------------------------------------------------------------------------|---------|------------------------------------------------------------|------|-------------------------------------------------------------------------------------|
|                                                | <i>Type I</i>                                                                |         |                                                            |      |                                                                                     |
| <b>PdMe<sub>2</sub>Pc</b>                      | MAPbI <sub>3</sub>                                                           | 16.28   | $3.42 \times 10^{-2}$                                      | 73   | 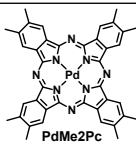 |
| <b>3F-br-4C<sup>a</sup></b>                    | MAPbI <sub>3</sub>                                                           | 16.9    | $4.0 \times 10^{-5}$                                       | 75   |  |
| <b>PCA-1</b>                                   | MAPbI <sub>3</sub>                                                           | 18.17   | $2.0 \times 10^{-3}$ <sup>b</sup>                          | 24   |  |
| <b>CuPc-OBu</b>                                | (FAPbI <sub>3</sub> ) <sub>0.85</sub> (MAPbBr <sub>3</sub> ) <sub>0.15</sub> | 17.6    | $4.30 \times 10^{-4}$                                      | 25   |  |
| <b>CuPc nanorod</b>                            | MAPbI <sub>3</sub>                                                           | 16.1    | 10 <sup>-2</sup>                                           | 72   |  |
| <b>ZnPcNO<sub>2</sub>-OPh</b>                  | (FAPbI <sub>3</sub> ) <sub>0.85</sub> (MAPbBr <sub>3</sub> ) <sub>0.15</sub> | 14.35   | $2.80 \times 10^{-5}$                                      | 83   |  |
| <b>M7-TFSI</b>                                 | (FAPbI <sub>3</sub> ) <sub>0.85</sub> (MAPbBr <sub>3</sub> ) <sub>0.15</sub> | 17.7    | $3.24 \times 10^{-4}$                                      | 67   |  |
| <b>DFBT(DTS-FBTTh<sub>2</sub>)<sub>2</sub></b> | MAPbI <sub>3</sub>                                                           | 17.3    | $1.78 \times 10^{-4}$                                      | 68   |  |
| <b>ACE-QA-ACE</b>                              | MAPbI <sub>3</sub>                                                           | 18.2    | $2.3 \times 10^{-4}$                                       | 69   |  |
| <b>DERDTS-TBDT</b>                             | MAPbI <sub>3-x</sub> Cl <sub>x</sub>                                         | 16.2    | $1 \times 10^{-4}$                                         | 70   |  |
| <b>KR321</b>                                   | (FAPbI <sub>3</sub> ) <sub>0.85</sub> (MAPbBr <sub>3</sub> ) <sub>0.15</sub> | 19.03   | $2.6 \times 10^{-4}$                                       | 39   |  |
| <b>FA-CN</b>                                   | (FAPbI <sub>3</sub> ) <sub>0.85</sub> (MAPbBr <sub>3</sub> ) <sub>0.15</sub> | 18.9    | $1.2 \times 10^{-4}$                                       | 59   |  |

**Table S2. (Conti.)**

| HTM name                    | Perovskite                                                                                                                         | PCE (%) | $\mu_h$ (cm <sup>2</sup> V <sup>-1</sup> s <sup>-1</sup> ) | ref. | Molecular structure                                                                 |
|-----------------------------|------------------------------------------------------------------------------------------------------------------------------------|---------|------------------------------------------------------------|------|-------------------------------------------------------------------------------------|
|                             | <b><i>Type II</i></b>                                                                                                              |         |                                                            |      |                                                                                     |
| <b>mDPA-DBTP</b>            | MAPbI <sub>3</sub>                                                                                                                 | 18.09   | $6.34 \times 10^{-4}$                                      | 60   | 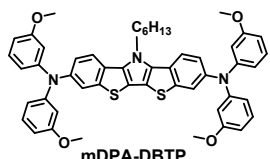 |
| <b>BTF4</b>                 | (FAPbI <sub>3</sub> ) <sub>0.85</sub> (MAPbBr <sub>3</sub> ) <sub>0.15</sub>                                                       | 18.03   | $1.17 \times 10^{-4}$                                      | 61   |  |
| <b>TPA-ANT-TPA</b>          | MAPbI <sub>3</sub>                                                                                                                 | 17.5    | $2.6 \times 10^{-4}$                                       | 62   |  |
| <b>YN2</b>                  | (FAPbI <sub>3</sub> ) <sub>0.85</sub> (MAPbBr <sub>3</sub> ) <sub>0.15</sub>                                                       | 19.27   | $9.65 \times 10^{-4}$                                      | 63   |  |
| <b>Z34</b>                  | MAPbI <sub>3</sub>                                                                                                                 | 16.1    | $7.46 \times 10^{-4}$                                      | 71   |  |
| <b>IDTT-TPA</b>             | MAPbI <sub>3</sub>                                                                                                                 | 15.9    | $6.46 \times 10^{-4}$                                      | 79   |  |
| <b>X44</b>                  | [FA] <sub>0.85</sub> (MA) <sub>0.15</sub> Pb(I <sub>0.85</sub> Br <sub>0.15</sub> ) <sub>3</sub>                                   | 15.2    | -                                                          | 80   |  |
| <b>CMO</b>                  | MAPbI <sub>3</sub>                                                                                                                 | 15.92   | $1.4 \times 10^{-5}$                                       | 82   |  |
| <b>IDTC<sub>6</sub>-TPA</b> | MAPbI <sub>3</sub>                                                                                                                 | 14.52   | $4.26 \times 10^{-4}$                                      | 84   |  |
| <b>M104</b>                 | (FAPbI <sub>3</sub> ) <sub>0.85</sub> (MAPbBr <sub>3</sub> ) <sub>0.15</sub>                                                       | 16.50   | $1.12 \times 10^{-4}$                                      | 85   |  |
| <b>YN3</b>                  | (FAPbI <sub>3</sub> ) <sub>0.85</sub> (MAPbBr <sub>3</sub> ) <sub>0.15</sub>                                                       | 18.84   | $2.25 \times 10^{-4}$                                      | 65   |  |
| <b>TPAC-3M</b>              | MAPbI <sub>3</sub>                                                                                                                 | 17.54   | $1.1 \times 10^{-5}$                                       | 66   |  |
| <b>BTPA-TCNE</b>            | MAPbI <sub>3</sub>                                                                                                                 | 16.94   | $3.14 \times 10^{-5}$                                      | 49   |  |
| <b>NP2</b>                  | CS <sub>0.05</sub> (FA <sub>0.17</sub> MA <sub>0.83</sub> ) <sub>0.95</sub> Pb(Br <sub>0.17</sub> I <sub>0.83</sub> ) <sub>3</sub> | 16.4    | $4.23 \times 10^{-2}$                                      | 74   |  |

**Table S2. (Conti.)**

| HTM name                    | Perovskite                                                                                                                         | PCE (%) | $\mu_h$ (cm <sup>2</sup> V <sup>-1</sup> s <sup>-1</sup> ) | ref. | Molecular structure |
|-----------------------------|------------------------------------------------------------------------------------------------------------------------------------|---------|------------------------------------------------------------|------|---------------------|
| <b><i>Type III</i></b>      |                                                                                                                                    |         |                                                            |      |                     |
| <b>X62</b>                  | mixed cation/mixed halide                                                                                                          | 15.9    | $7.95 \times 10^{-5}$                                      | 76   |                     |
| <b>Spiro-S</b>              | MAPbI <sub>3</sub>                                                                                                                 | 15.92   | $1.90 \times 10^{-5}$                                      | 77   |                     |
| <b>Trux-OMeTAD</b>          | MAPbI <sub>3</sub>                                                                                                                 | 18.6    | $2 \times 10^{-3}$                                         | 31   |                     |
| <b>TTE-2</b>                | (FAPbI <sub>3</sub> ) <sub>0.95</sub> (MAPbBr <sub>3</sub> ) <sub>0.05</sub>                                                       | 20.04   | $6.18 \times 10^{-4}$                                      | 38   |                     |
| <b>HTB-OMe</b>              | MAPbI <sub>3</sub>                                                                                                                 | 17.3    | $5.48 \times 10^{-4}$                                      | 34   |                     |
| <b>TPP-SMeTAD</b>           | MAPbI <sub>3</sub>                                                                                                                 | 16.2    | $7.4 \times 10^{-5}$                                       | 84   |                     |
| <b>2,7-BCz-OMeTAD</b>       | Cs <sub>0.05</sub> FA <sub>0.79</sub> MA <sub>0.16</sub> PbI <sub>2.49</sub> Br <sub>0.51</sub>                                    | 17.6    | $0.95 \times 10^{-4}$                                      | 37   |                     |
| <b>m-MTDATA<sup>a</sup></b> | Cs <sub>0.05</sub> (FA <sub>0.85</sub> MA <sub>0.15</sub> ) <sub>0.95</sub> Pb(I <sub>0.85</sub> Br <sub>0.15</sub> ) <sub>3</sub> | 18.12   | $4.3 \times 10^{-5}$                                       | 35   |                     |
| <b>m-MTDATA<sup>a</sup></b> | MAPbI <sub>3</sub>                                                                                                                 | 17.73   | -                                                          | 36   |                     |
| <b>TPD-4MeOTPA</b>          | (FAI) <sub>0.85</sub> (PbI <sub>2</sub> ) <sub>0.85</sub> (MABr) <sub>0.15</sub> (PbBr <sub>2</sub> ) <sub>0.15</sub>              | 15.28   | $4.92 \times 10^{-4}$                                      | 81   |                     |
| <b>TCP-OH</b>               | (FAI) <sub>0.81</sub> (PbI <sub>2</sub> ) <sub>0.85</sub> (MAPbBr <sub>3</sub> ) <sub>0.15</sub>                                   | 16.97   | $5.85 \times 10^{-6}$                                      | 33   |                     |
| <b>LD-29</b>                | (FAPbI <sub>3</sub> ) <sub>0.85</sub> (MAPbBr <sub>3</sub> ) <sub>0.15</sub>                                                       | 14.29   | $1.72 \times 10^{-5}$                                      | 86   |                     |
| <b>ST1</b>                  | MAPbI <sub>3</sub>                                                                                                                 | 15.4    | $2.57 \times 10^{-4}$ <sup>c</sup>                         | 78   |                     |
| <b><i>Others</i></b>        |                                                                                                                                    |         |                                                            |      |                     |
| <b>V1036<sup>a</sup></b>    | Cs <sub>0.05</sub> (MA <sub>0.17</sub> FA <sub>0.83</sub> ) <sub>0.95</sub> Pb(I <sub>0.83</sub> Br <sub>0.17</sub> ) <sub>3</sub> | 17.8    | -                                                          | 64   |                     |
| <b>TAPC<sup>a</sup></b>     | MAPbI <sub>3</sub>                                                                                                                 | 18.80   | $4.94 \times 10^{-4}$ <sup>b</sup>                         | 58   |                     |

<sup>a</sup>inverted

PSC;

<sup>b</sup>annealed

HTM

film;

<sup>c</sup>determined

via

TOF.

EH

=

2-ethylhexyl

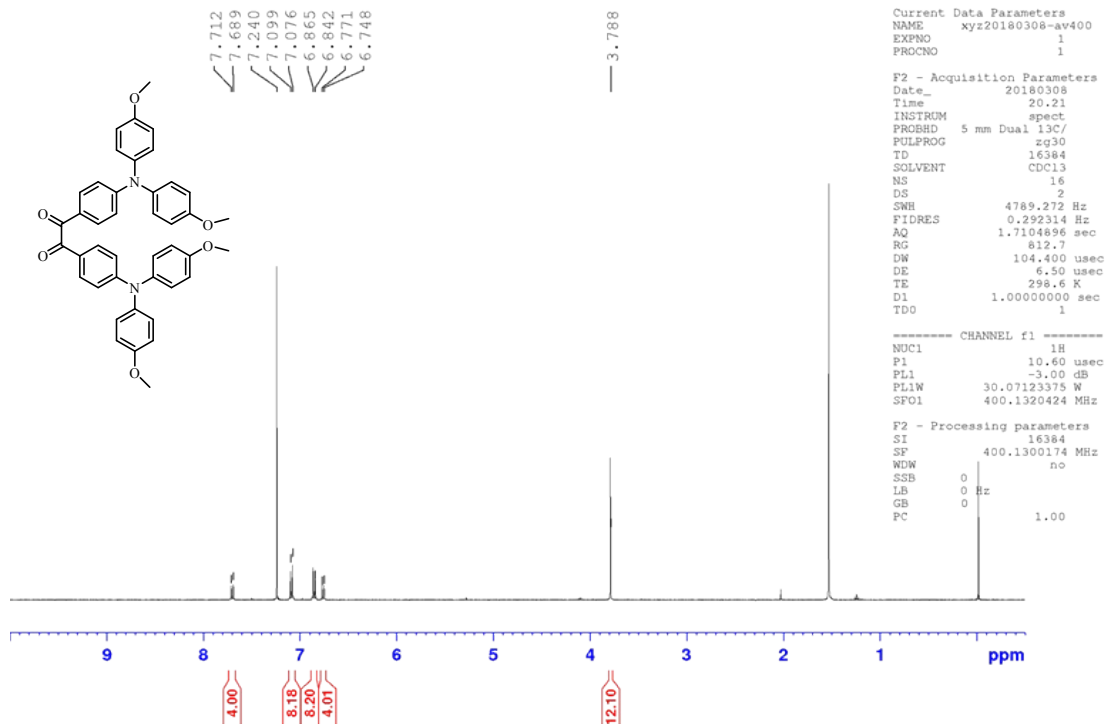

Figure S16. <sup>1</sup>H NMR spectrum of OMeTPA-dione

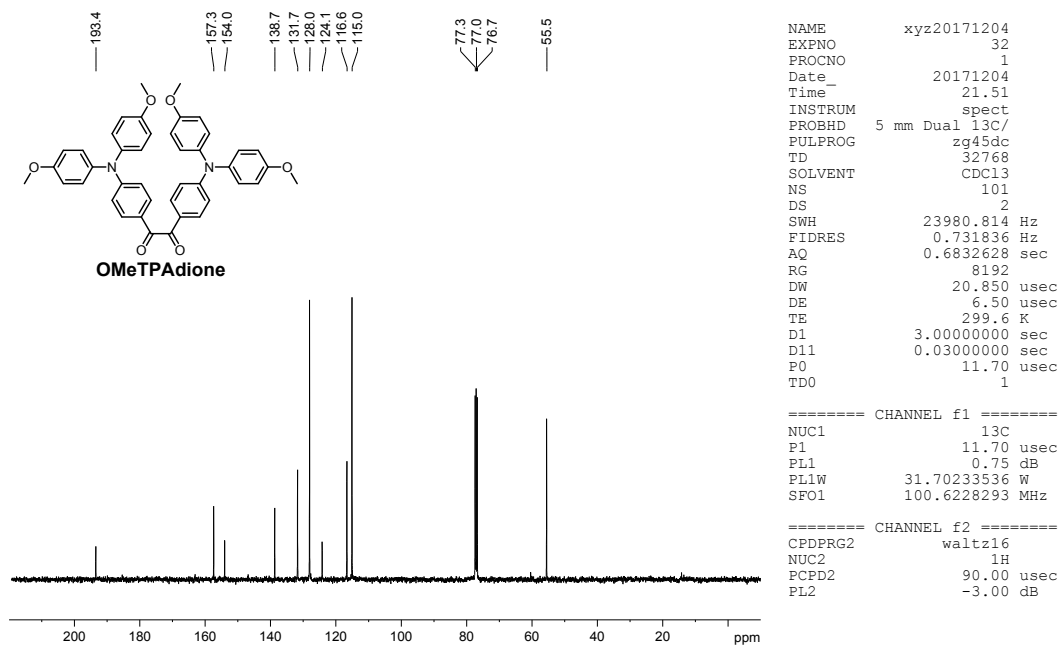

Figure S17. <sup>13</sup>C NMR spectrum of OMeTPA-dione

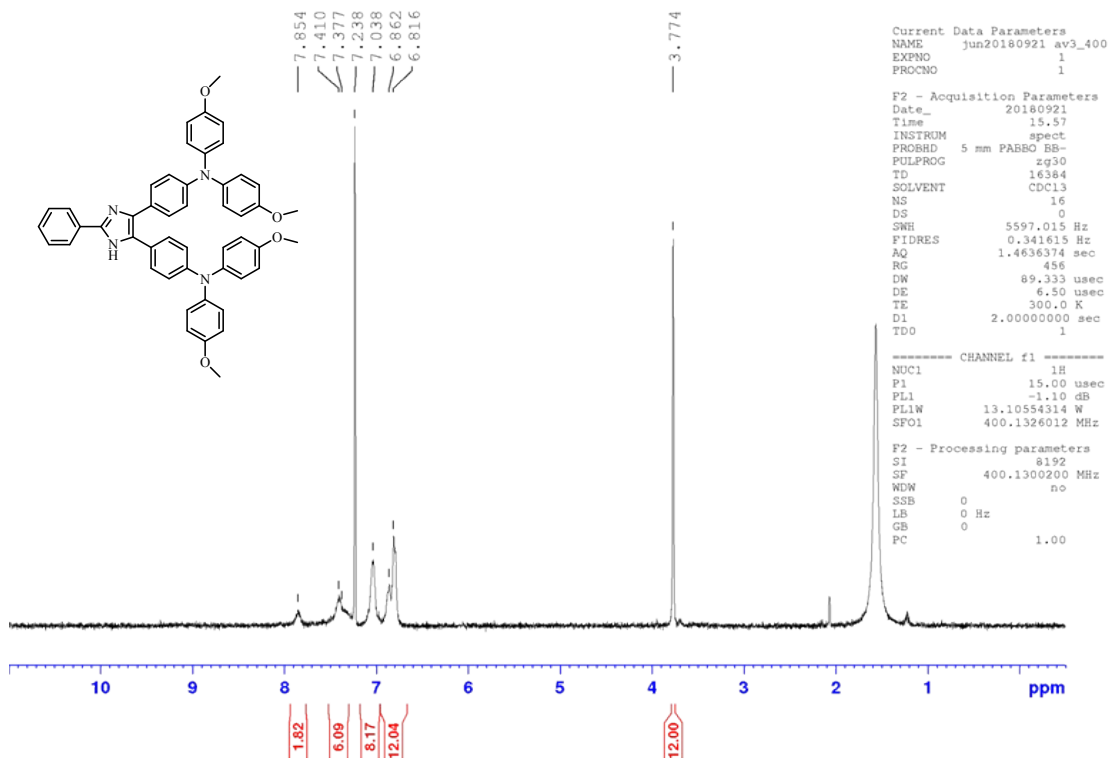

Figure S18. <sup>1</sup>H NMR of spectrum of Ph-TPA-2A

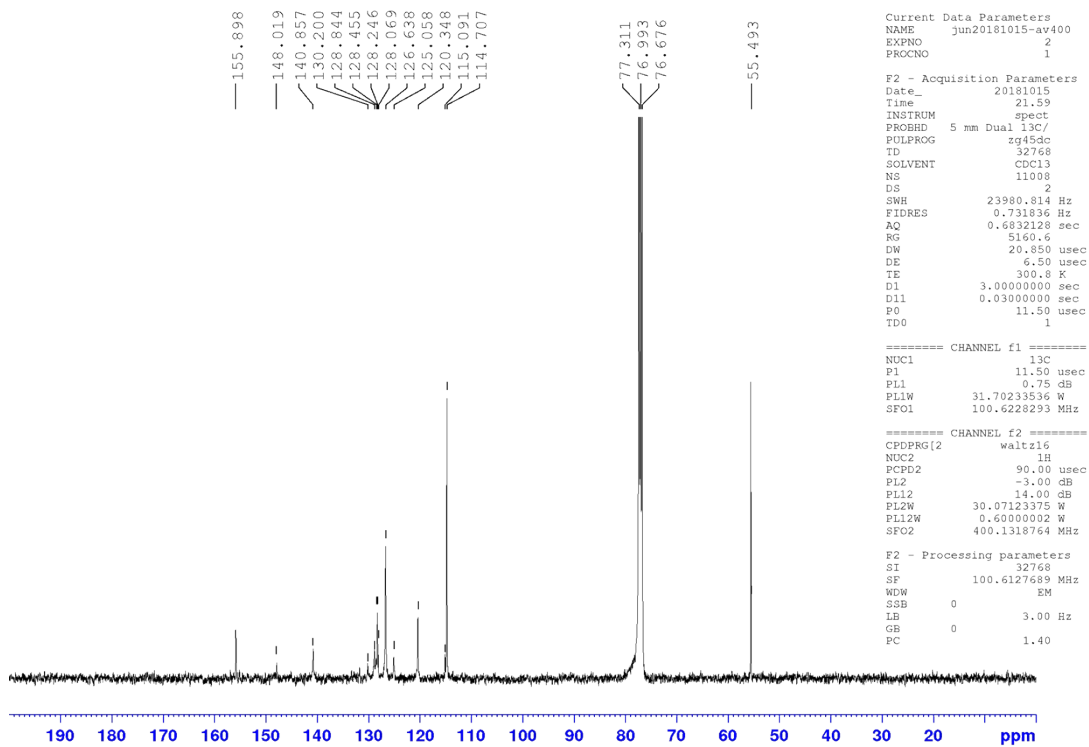

Figure S19. <sup>13</sup>C NMR spectrum of Ph-TPA-2A



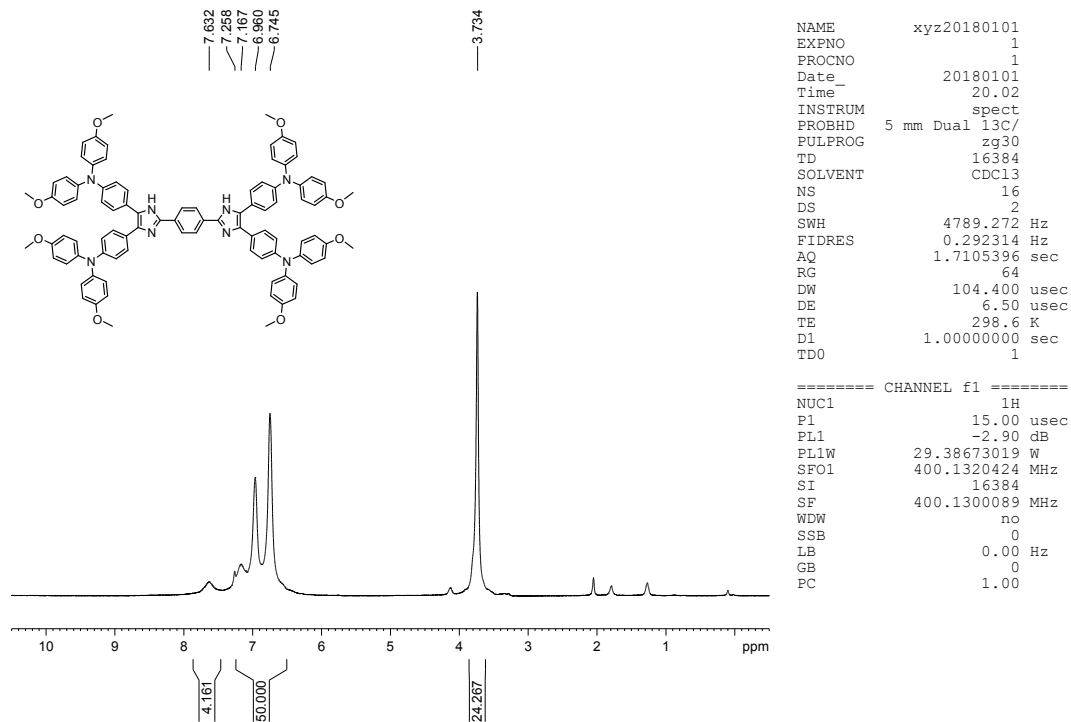

Figure S20. <sup>1</sup>H NMR spectrum of Ph-TPA-4A

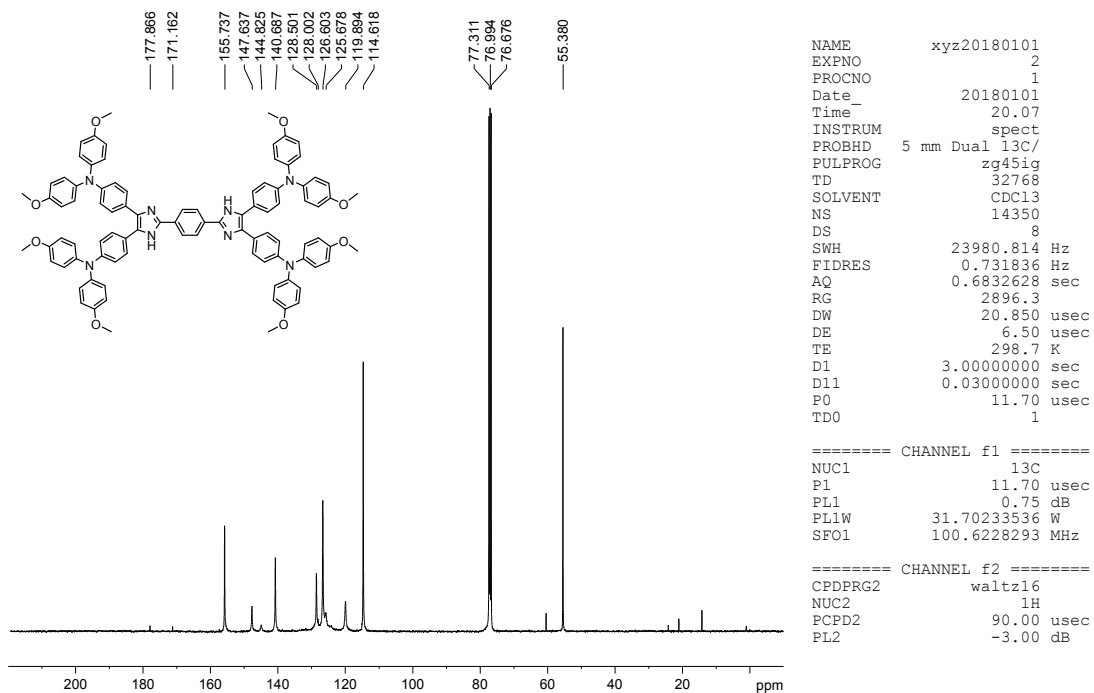

Figure S21. <sup>13</sup>C NMR spectrum of Ph-TPA-4A

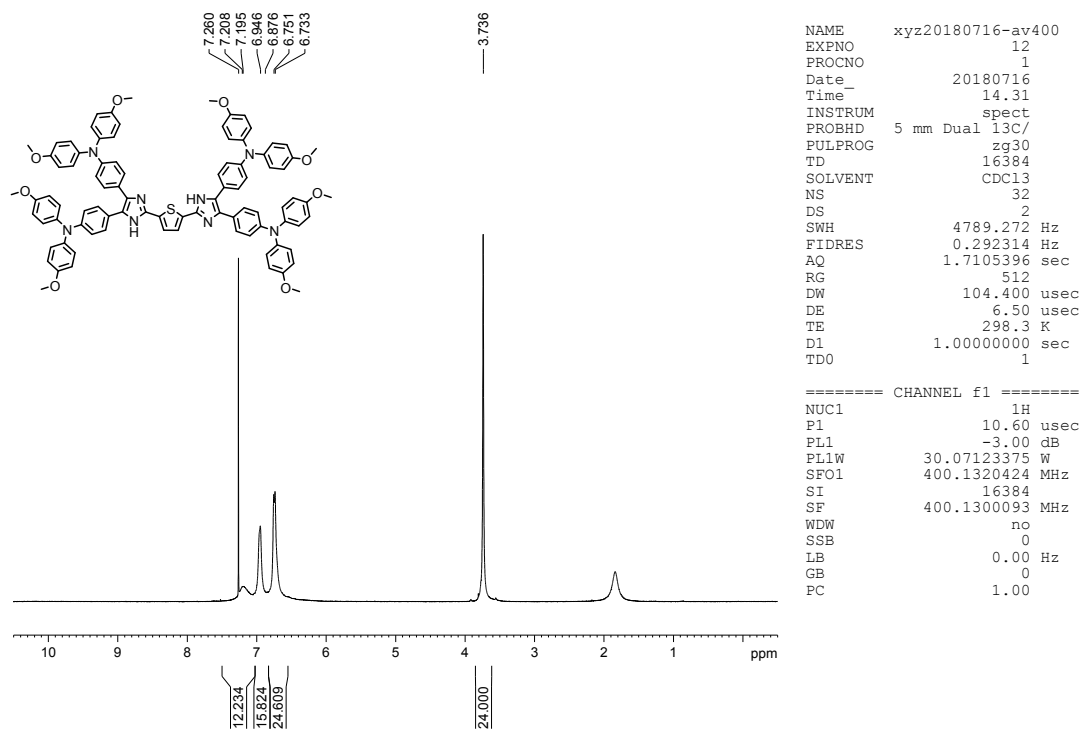

Figure S22. <sup>1</sup>H NMR spectrum of Th-TPA-4A

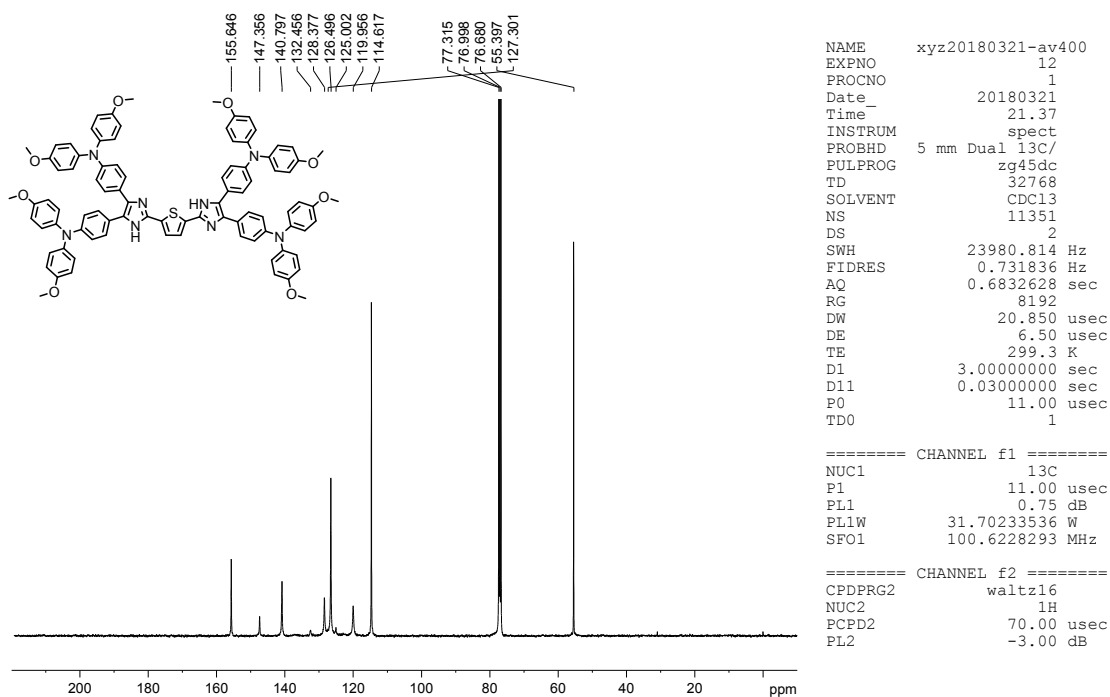

Figure S23. <sup>13</sup>C NMR spectrum of Th-TPA-4A

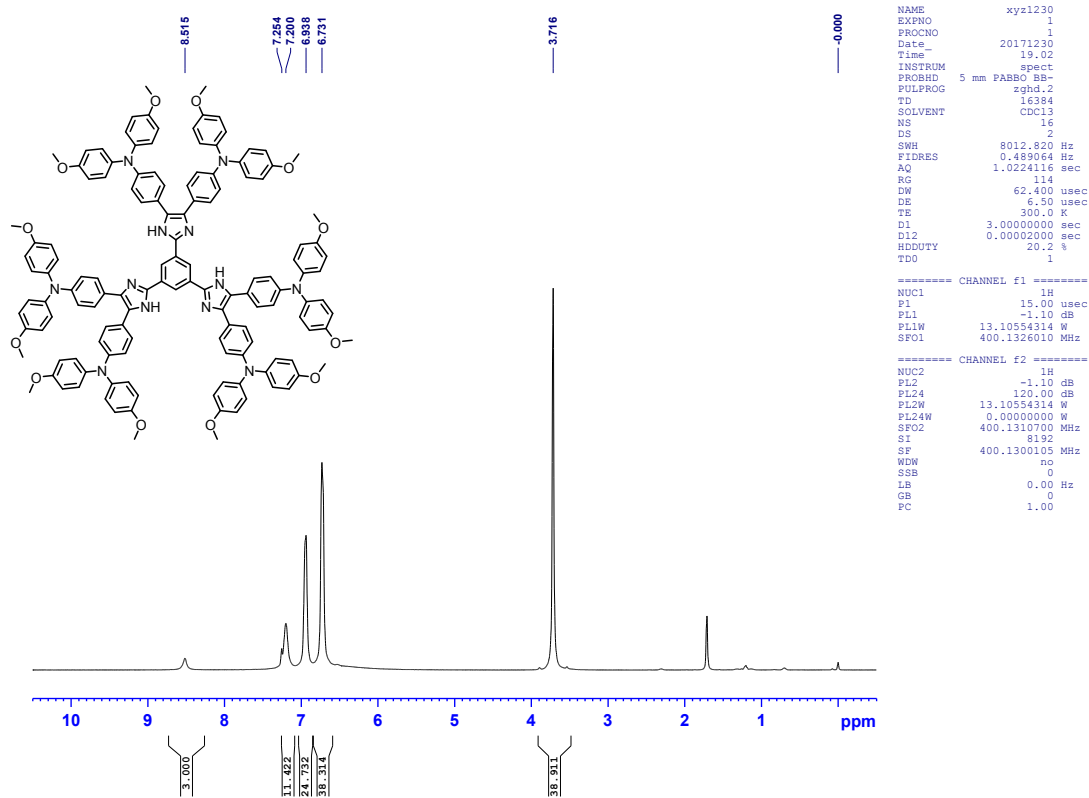

Figure S24. <sup>1</sup>H NMR spectrum of Ph-TPA-6A

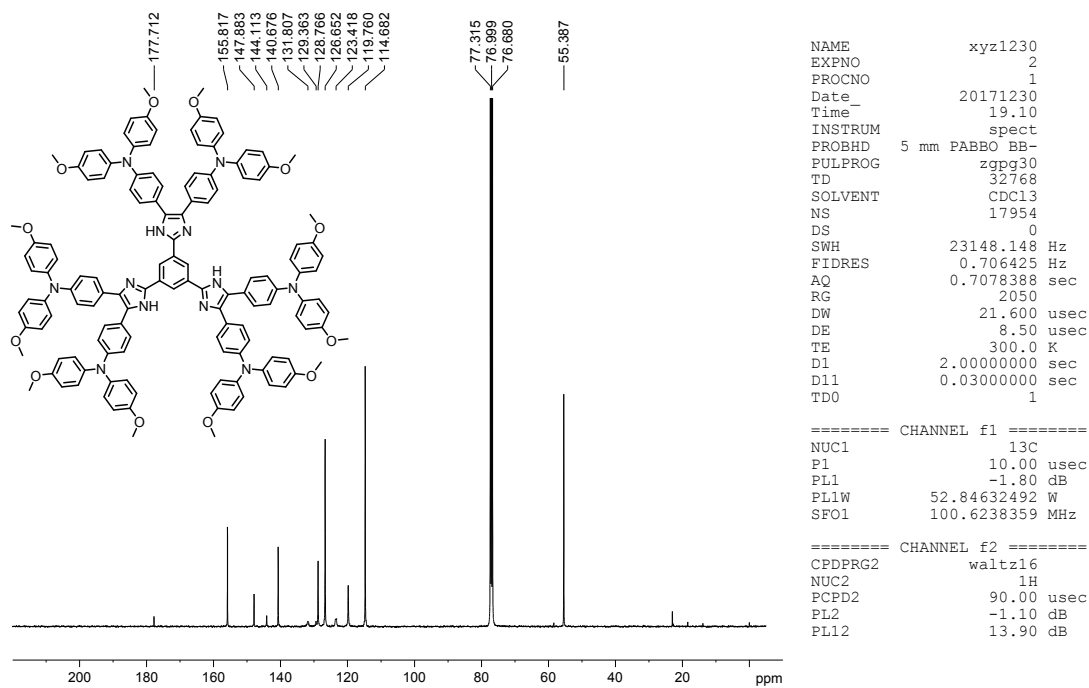

Figure S25. <sup>13</sup>C NMR spectrum of Ph-TPA-6A

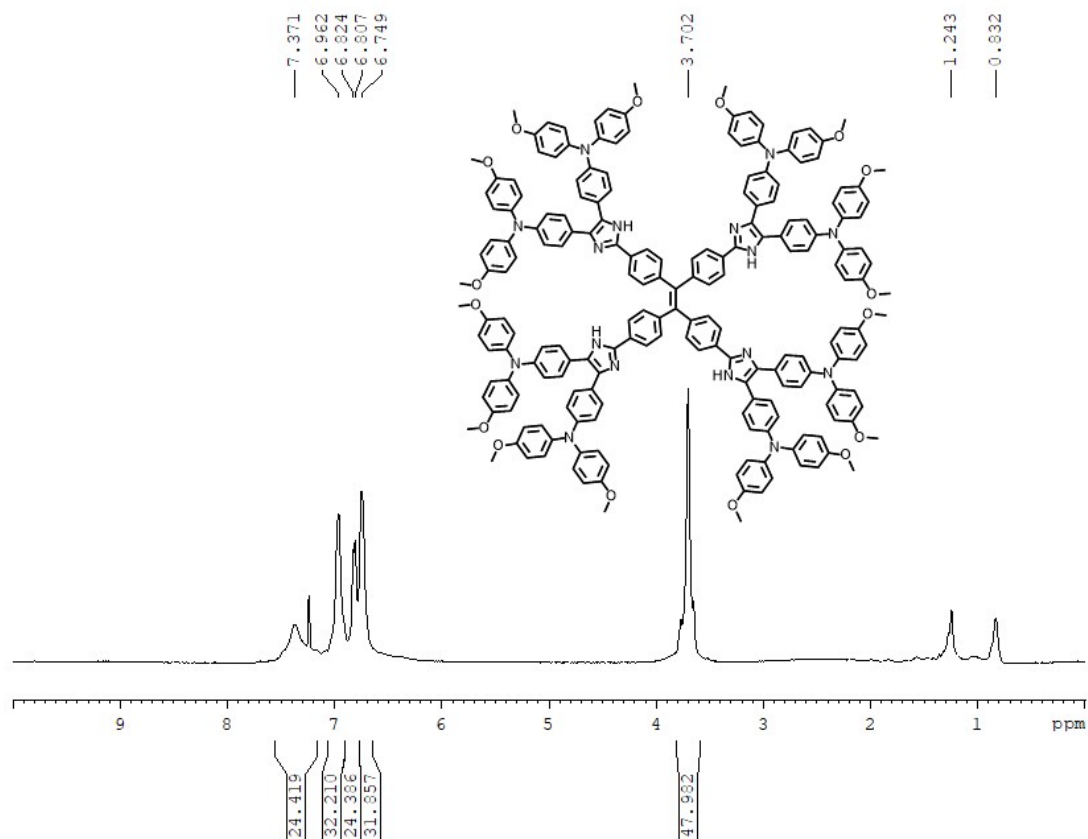

Figure S26. <sup>1</sup>H NMR spectrum of TPE-TPA-8A

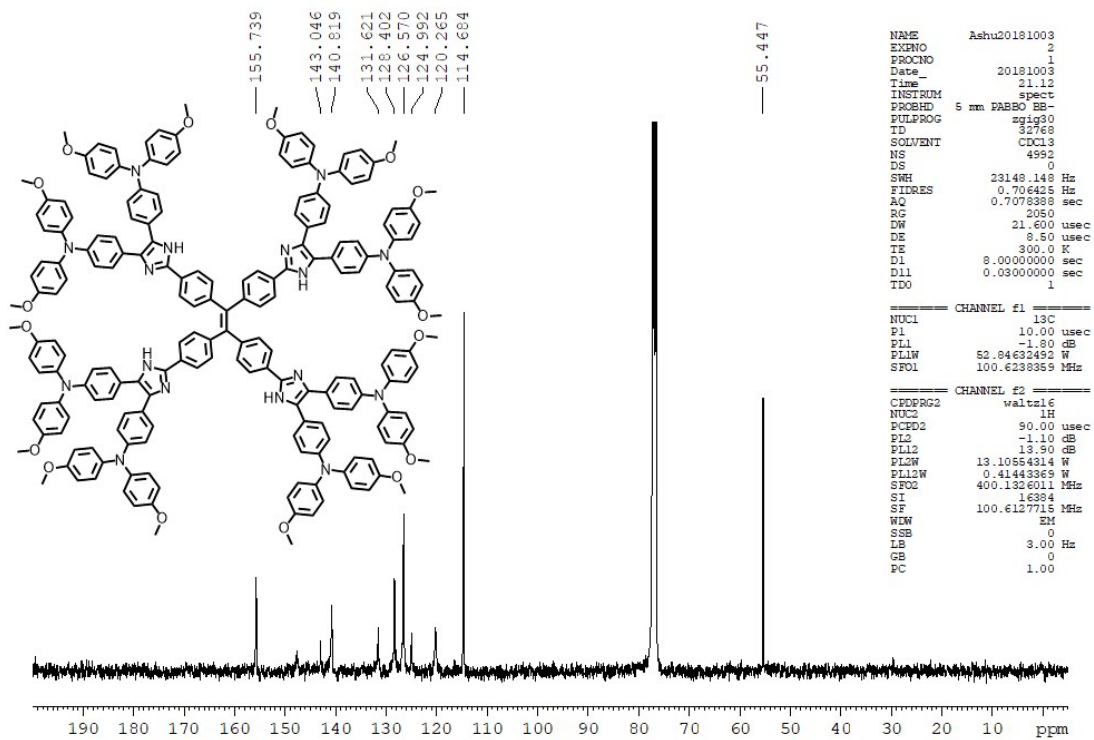

Figure S27. <sup>13</sup>C NMR spectrum of TPE-TPA-8A

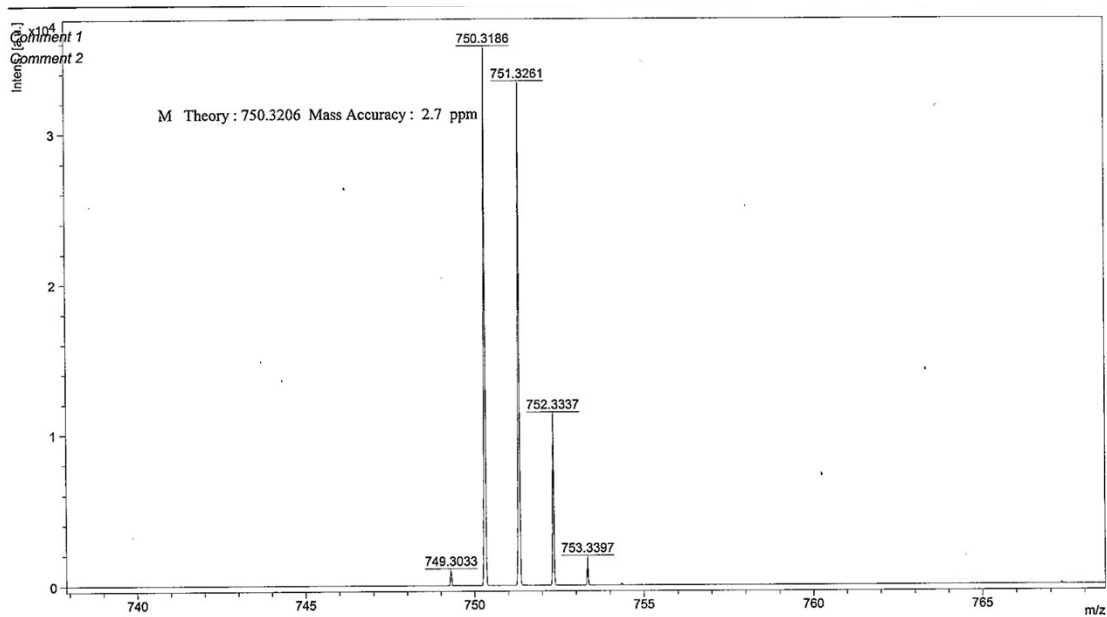

Figure S28. MALDI-TOF mass spectrum of **Ph-TPA-2A**

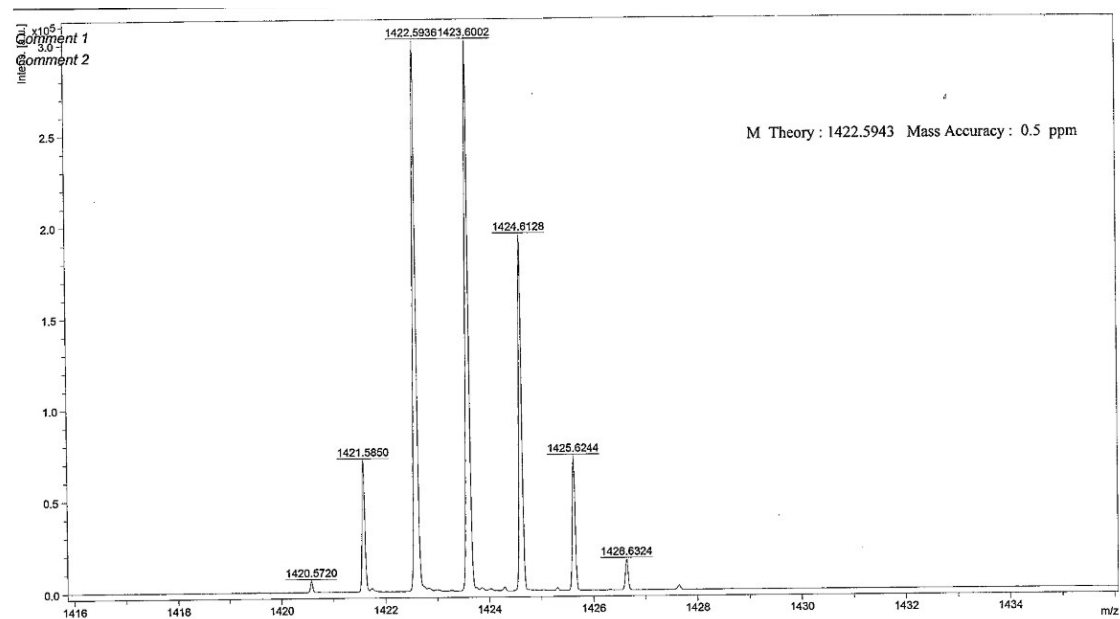

Figure S29. MALDI-TOF mass spectrum of **Ph-TPA-4A**

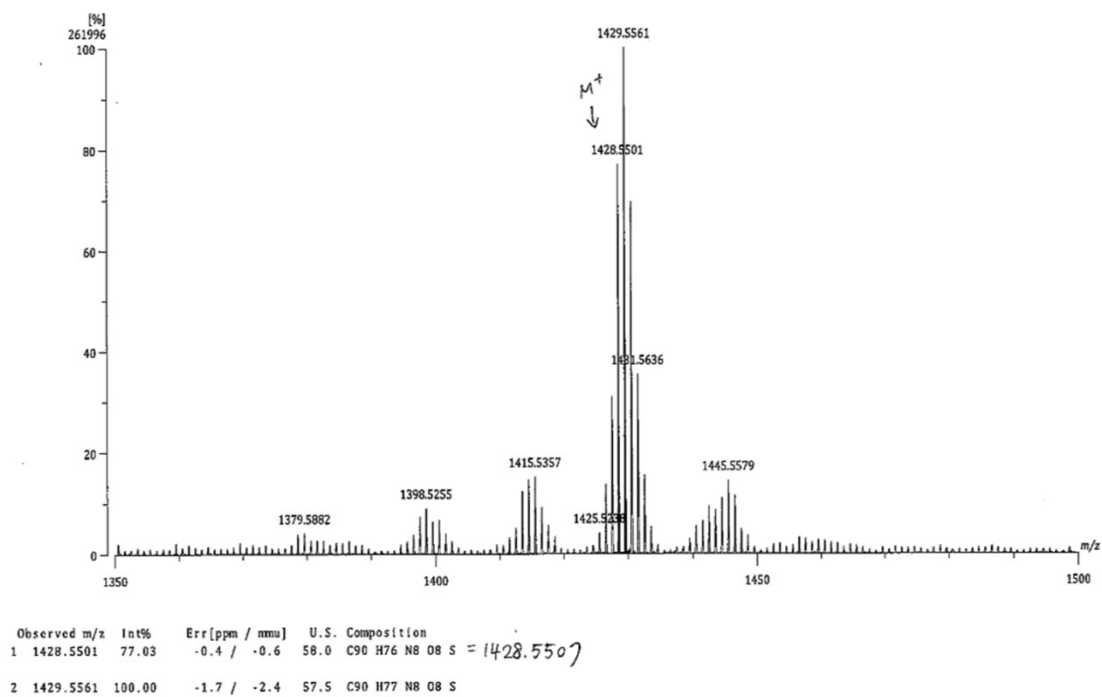

**Figure S30.** FAB mass spectrum of **Th-TPA-4A**

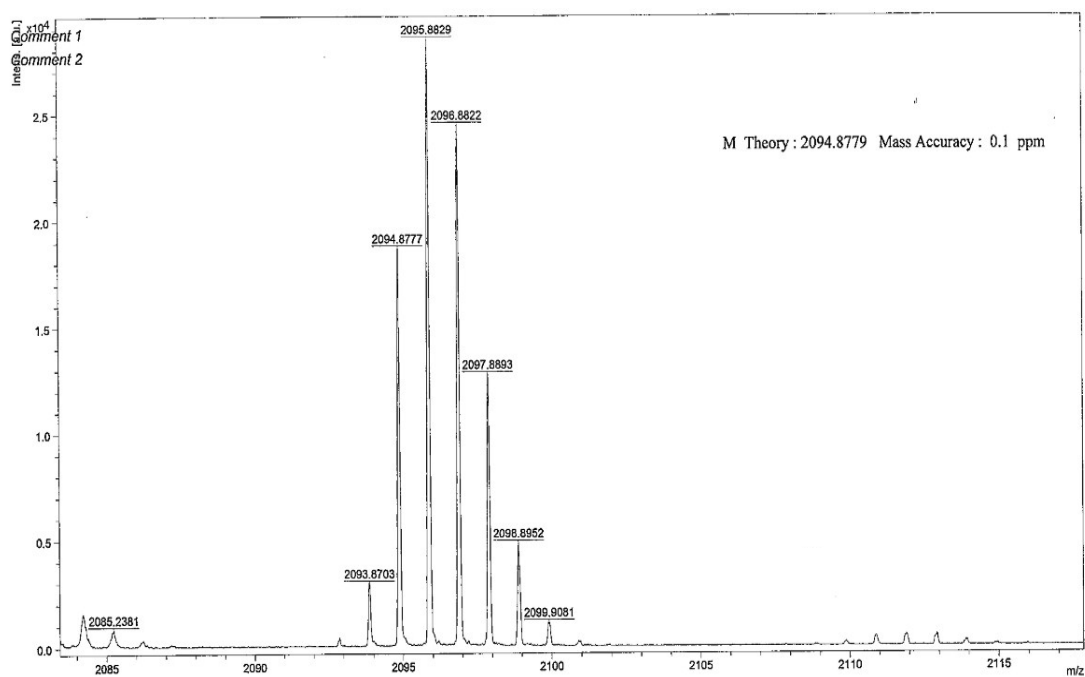

**Figure S31.** MALDI-TOF mass spectrum of **Ph-TPA-6A**

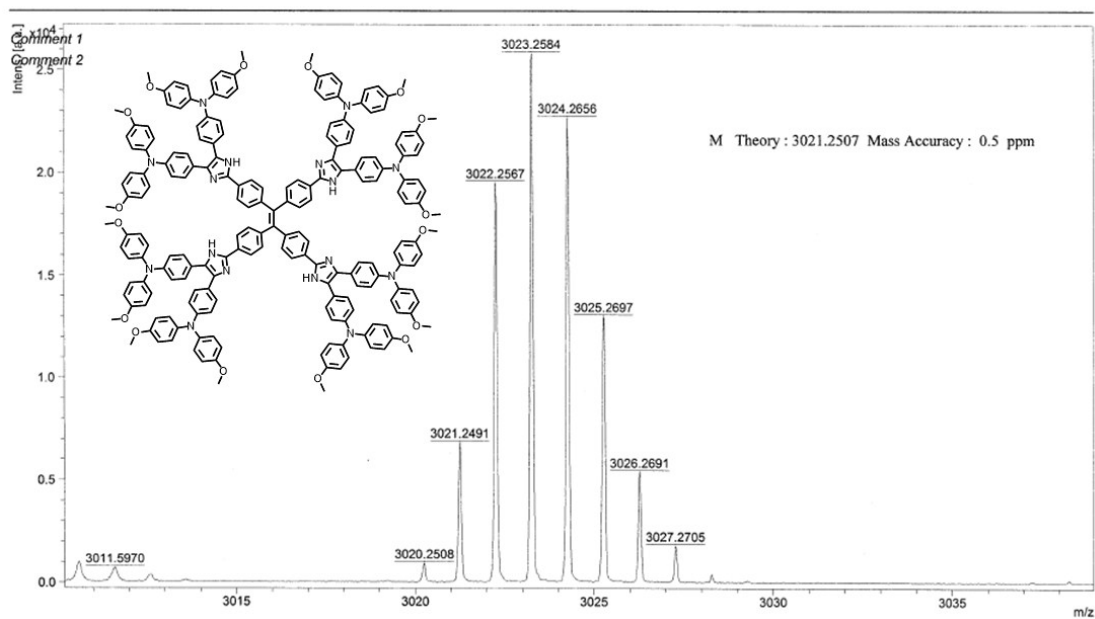

**Figure S32.** MALDI-TOF mass spectrum of **TPE-TPA-8A**
